1 Forest change within and outside protected  
2 areas in the Dominican Republic, 2000-2016

3

4 John D. Lloyd<sup>1\*</sup>, Yolanda M. León<sup>2,3</sup>

5

6 <sup>1</sup> Vermont Center for Ecostudies, PO Box 420, Norwich, VT, United States of America

7 <sup>2</sup> Instituto Tecnológico de Santo Domingo (INTEC), ave. Los Próceres, Galá, Santo Domingo,  
8 Dominican Republic

9 <sup>3</sup> Grupo Jaragua, c. El Vergel 33, El Vergel Santo Domingo, Dominican Republic

10 \* Corresponding author

11 Email: [jlloyd@vtecostudies.org](mailto:jlloyd@vtecostudies.org)

12

## 13 Abstract

14 We used Landsat-based estimates of tree cover change to document the loss and gain  
15 of forest in the Dominican Republic between 2000 and 2016. Overall, 2,795 km<sup>2</sup> of forest were  
16 lost, with forest gain occurring on only 393 km<sup>2</sup>, yielding a net loss of 2,402 km<sup>2</sup> of forest, a  
17 decline of 11.1% or 0.7% per year. Deforestation occurred in all of the major forest types in the  
18 country, and ranged from a 13% decline in the area of semi-moist broadleaf forest to a 5.9%  
19 loss of cloud forest, mostly attributed to agriculture. Fire was a significant driver of forest loss  
20 only in Hispaniolan pine (*Pinus occidentalis*) forests and, to a lesser extent, in adjacent cloud  
21 forest. Deforestation rates were lower within protected areas, especially in dry and semi-moist  
22 broadleaf forests at lower elevations. Protected areas had a smaller, and generally negligible,  
23 effect on rates of forest loss in pine forest and cloud forest, largely due to the effects of several  
24 large wildfires. Overall, rates of deforestation in the Dominican Republic were higher than  
25 regional averages from across the Neotropics and appeared to have accelerated during the  
26 later years of our study period. Stemming deforestation will likely require enforcement of  
27 prohibitions on large-scale agricultural production within protected areas and development of  
28 alternatives to short-cycle, shifting agriculture.

## 29 Introduction

30 Human well-being is linked inextricably with the fate of the planet's forests. Forests  
31 provide goods and income to the rural poor throughout the developing world [1], generate  
32 employment for more than 10 million people throughout the world [2], yield renewable flows of  
33 raw materials for commercial and domestic use, sustain stable flows of clean water [3,4], buffer  
34 against local extremes of climate [5], and regulate global climate and carbon cycles [6,7].  
35 Indeed, the very persistence of modern human societies may be incompatible with the  
36 conditions created by ongoing deforestation [8]. The survival of an uncounted number of non-  
37 human species also depends on the persistence of forested landscapes.

38 Efforts to conserve Earth's remaining forests, and to understand the consequences of  
39 their disappearance, demand estimates of where, and at what rate, forest loss is occurring  
40 [9,10]. Reliable national-level data on forests is urgently needed to inform policies on forest  
41 conservation, sustainable development, and climate-change mitigation. A significant contribution  
42 to these efforts was made by Hansen et al. [9], who provided satellite-based estimates of global  
43 forest cover at a relatively fine temporal and spatial scale. Those data have been used  
44 subsequently to generate regional estimates of deforestation [11], estimates of loss of specific  
45 forest types [12], and country-specific descriptions of forest change [13]. Although analyses at  
46 planetary and regional scales provide useful insights for efforts to limit the deleterious  
47 consequences of global change [14] or meet global sustainable development goals [15],  
48 smaller-scale analyses, especially at the national or sub-national level, are useful because they  
49 align more closely with the level at which policies on forest use and conservation are  
50 implemented. Thus, country-specific analyses of deforestation allow for the evaluation of the  
51 efficacy of conservation interventions and, ideally, implementation of adaptive changes as  
52 needed.

53

54 Here, we examine spatial and temporal patterns of change in forest cover in the  
55 Dominican Republic (DR) between 2000 and 2016 using Hansen et al.'s [9] forest-cover dataset  
56 and its annual updates. In particular, we document changes in the extent of forest cover, by  
57 forest type, and examine the efficacy of the nation's system of protected areas - the country's  
58 primary conservation tool - in stemming forest loss. We focused on the DR for several reasons.  
59 First, as a middle-income country, it is broadly reflective of the changing dynamics and  
60 challenges faced globally in conserving forests in developing countries experiencing rapid  
61 economic growth: the DR's average economic growth of 5.3% over the past 25 years has been  
62 among the strongest in Latin America and the Caribbean [16]. Second, it supports an  
63 outstanding number of forest-dependent endemic plants and animals [17,18], many of which are  
64 threatened with extinction [19]. Third, very little published, quantitative information exists on the  
65 status of forests in the DR. Only two studies have produced quantitative estimates of change in  
66 forest cover [20,21], and none that we are aware of have produced estimates specific to the  
67 different forest types in the country. In quantifying recent changes in the extent of different forest  
68 ecosystems in the DR, we hope to provide an initial evaluation of forest-specific conservation  
69 policies, identify spatial hotspots of deforestation and forest types at greatest risk, and to  
70 suggest fruitful areas for investment of conservation resources.

## 71 **Methods**

### 72 **Quantifying forest change**

73 We estimated annual changes in forest cover in the DR between 2000 and 2016 using  
74 version 1.4 of the Hansen et al. [9] tree cover data, accessed through the Google Earth Engine  
75 [22]. The baseline year for these data is 2000, at which time percent tree cover was estimated in  
76 every 30-m pixel. Tree cover was defined by Hansen et al. [9] as all vegetation >5 m tall. In  
77 each subsequent year, every pixel can either remain in a forested state or undergo  
78 deforestation, which is defined as the transition to an entirely unforested state at the Landsat  
79 pixel level. Partial removal of forest canopy is not considered loss in the scope of this analysis.  
80 Forest gain, conversely, is defined as the transition from unforested to >50% tree cover during  
81 the period 2000-2012; forest gain is not calculated on an annual basis nor does it include  
82 regrowth after 2012. We used the per-pixel estimate of tree cover in 2000 as our baseline such  
83 that our estimates of the area of forest cover lost or gained are corrected for initial conditions.  
84 For example, a pixel (900 m<sup>2</sup>) that was estimated to have had 25% tree cover in 2000, and that  
85 was identified as having been deforested between 2000 and 2016, was calculated to have  
86 contributed a loss of 225 m<sup>2</sup> of forest (i.e., total pixel area multiplied by the percent of forest  
87 cover in 2000).

88 We calculated change in the extent of forest in two ways. First, we estimated change  
89 from 2000-2016 for all areas identified as forested in 2000 by Hansen et al. [9]. This provides a  
90 broad overview of changes in tree cover across the country, including not only in natural forest  
91 but also in heavily managed areas like forested parks in urban areas or agroforestry plantations.  
92 To gain insight into patterns of change in naturally forested areas, we also generated separate  
93 estimates of change for each major forest type identified in the 1996 land-cover map of

94 Tolentino and Peña [23], which provides the only pre-2000 estimate of land-cover types across  
95 the country. For this portion of the analysis, we focused only on natural, unmanaged forests,  
96 thus excluding urban parks, tree plantations (e.g., mango [*Mangifera* spp.], coconut [*Cocos*  
97 *nucifera*], and oil palm [*Elaeis guineensis*]), and shade crops (e.g., coffee [*Coffea arabica*] or  
98 cacao [*Theobroma cacao*]).

99 The forest types considered in the second analysis include Hispaniolan pine (*Pinus*  
100 *occidentalis*) forest, which was classified by Tolentino and Peña [23] into both an open (“bosque  
101 conífera abierto”) and closed-canopy (“bosque conífera denso”) category; cloud forest (“bosque  
102 nublado”); moist broadleaf forest (“bosque húmedo”); semi-moist broadleaf forest (“bosque  
103 semihúmedo”); and dry forest (“bosque seco”). Pine forests occur at the highest, coldest  
104 elevations of the Sierra de Bahoruco, Sierra de Neiba, and Cordillera Central. Cloud forest  
105 usually arises at the lower elevational limit of pine, in areas with mild temperatures, abundant  
106 precipitation, and persistent ground-level clouds. Cloud forest transitions into moist broadleaf  
107 forest at lower elevations where average annual precipitation drops below ~2,000 mm [23].  
108 Moist broadleaf forest occupies a broad elevational range, from near sea level in wet areas in  
109 the north of the country, such as Los Haitises, to ~1800 m on drier mountain slopes, such as the  
110 southern slope of Sierra de Bahoruco. Semi-moist broadleaf forest occurs in coastal areas and  
111 on mountain slopes as a transitional zone between dry forest and moist broadleaf forest. Dry  
112 forest is the only non-evergreen forest, found at relatively low elevations (< 500 m) with a warm,  
113 dry, and seasonal climate. Unlike the other forest types, most extant dry forest is secondary  
114 forest in the process of recovering from past anthropogenic disturbances [23].

## 115 **Separating wildfire from other causes of forest loss**

116 Fire can be a significant driver of vegetation dynamics in the DR, especially in montane  
117 forests [24], so to examine the role of wildfire as an agent of forest loss we used the monthly,  
118 MODIS-based estimates of the global area burned [25]. We aggregated monthly estimates of  
119 area burned for each year and assumed that forest loss was caused by fire for any pixel in the  
120 Hansen et al. [9] data that was within the boundaries of a burned area and was estimated as  
121 having been deforested in that year.

## 122 **Quantifying forest change within protected areas**

123 The DR has an extensive national protected area system, covering 26% of its territory  
124 [26]. To examine whether forest within formally protected areas showed different patterns of  
125 change, we calculated forest change and area burned for each protected area within the DR.

## 126 **Results**

### 127 **Quantifying forest change**

128 Trees covered 21,494 km<sup>2</sup> of the DR in 2000, roughly 45% of its total land area.  
129 Deforestation removed 2,795 km<sup>2</sup> of this tree cover by 2016, while reforestation or afforestation

130 occurred on only 393 km<sup>2</sup>, a net loss of 2,402 km<sup>2</sup>, reducing forest cover to roughly 40% of the  
 131 territory. This amounts to an 11.1% decline in forest cover at the national level over the period of  
 132 analysis, an annual deforestation rate of 0.7%.

133 Considering only the DR's major natural forest types, forest cover shrank from 9,517 km<sup>2</sup>  
 134 in 2000 to 8,644 km<sup>2</sup> in 2016, a net loss of 9.2% (Table 1). Depending on forest type, this  
 135 change ranged from -5.9% in cloud forests to -13.1% in semi-moist forests. The extent of loss  
 136 varied among years but, with the exception of dry forest, tended to increase after 2010 (Fig 1).  
 137 Forest gain was negligible in all of the natural forest types.

138

139 **Table 1. Changes in the estimated areal extent of forest in the Dominican Republic**  
 140 **between 2000 and 2016 for the 6 forested land-cover types identified in national land-**  
 141 **cover mapping.**

| Forest type<br>(original<br>classification<br>name)              | Area<br>(km <sup>2</sup> ),<br>2000 | Area<br>(km <sup>2</sup> ),<br>2016 | Area lost<br>(km <sup>2</sup> ) | Area<br>gained<br>(km <sup>2</sup> ) | Net<br>change<br>(%) | Percent<br>loss due<br>to fire |
|------------------------------------------------------------------|-------------------------------------|-------------------------------------|---------------------------------|--------------------------------------|----------------------|--------------------------------|
| <b>Closed-canopy<br/>pine (conifera<br/>denso)</b>               | 1660.1                              | 1503.0                              | 157.6                           | 0.6                                  | -10.5                | 48.2                           |
| <b>Open-canopy<br/>pine (conifera<br/>abierto)</b>               | 638.7                               | 566.7                               | 72.3                            | 0.3                                  | -12.7                | 56.1                           |
| <b>Cloud forest<br/>(latifoliado<br/>nublado)</b>                | 951.8                               | 898.9                               | 53.0                            | 0.2                                  | -5.9                 | 31.1                           |
| <b>Moist broadleaf<br/>(latifoliado<br/>húmedo)</b>              | 2566.6                              | 2362.2                              | 206.7                           | 2.3                                  | -8.7                 | 6.8                            |
| <b>Semi-moist<br/>broadleaf<br/>(latifoliado<br/>semihúmedo)</b> | 1527.0                              | 1350.1                              | 179.3                           | 2.4                                  | -13.1                | 3.2                            |
| <b>Dry (seco)</b>                                                | 2173.1                              | 1962.9                              | 214.7                           | 4.5                                  | -10.7                | 3.4                            |

142

143 **Fig 1. Deforestation rates in the Dominican Republic from 2000-2016 in each of the**  
 144 **country's major upland forest types.** The extent of deforestation (solid black line) varied  
 145 among years and among the six major forest types. When smoothed via loess (solid blue line;  
 146 shaded interval is 95% confidence interval), deforestation appeared to accelerate after 2010,  
 147 with the exception of dry forest.

148

## 149 Fire as a deforestation driver

150 Fire accounted for a significant amount of loss in the Hispaniolan pine forests, in both  
151 open- and closed-canopy types (Table 1). However, most of the loss caused by fire occurred in  
152 a single year (Fig 2). In closed-canopy pine forest, fires in 2005 accounted for roughly 77% of  
153 the area burned between 2000 and 2016; in open-canopy pine, 50%; in cloud forest, 53%; and  
154 in moist broadleaf, 55%. Lesser peaks occurred in 2014 for both pine forest types (12% and 6%  
155 of total area burned over the course of the study for closed-canopy and open-canopy,  
156 respectively) and again in 2015 with losses for closed-canopy pine (4%), open-canopy pine  
157 (10%), cloud forest (19%), and moist broadleaf (32%). Fire accounted for relatively little loss in  
158 area among the dry and semi-moist broadleaf forest types.

159  
160 **Fig 2. Relative importance of fire and other sources as agents of forest loss in major**  
161 **upland forest types of the Dominican Republic, 2000-2016.** Declines in the extent of the six  
162 major forest types in the Dominican Republic were driven in most years by forest loss from  
163 sources other than fire (blue lines); significant losses due to fire were apparent only in 2005, as  
164 shown by the gap between the amount of forest lost to all sources (orange lines) and the  
165 amount of forest lost to sources other than fire. Lesser peaks in area burned were apparent in  
166 2015 for both pine types and cloud forest.

## 167 Protected area deforestation

168 Rates of deforestation within protected areas largely mirrored overall trends in forest  
169 change, except for dry and semi-moist broadleaf forests where forest loss was substantially  
170 lower within protected areas (Table 2). Within protected areas, forest accounted for 7,381 km<sup>2</sup> in  
171 2000, covering 57% of the land. By 2016, forest cover had shrunk by 670 km<sup>2</sup> (-8.5%) and  
172 covered only 52% of the land in protected areas.

173 Protected areas offered little defense against fire, either. Fire accounted for significant  
174 amounts of the estimated loss of both pine and cloud forests within protected areas (Table 2). In  
175 fact, of the three forest types experiencing significant losses due to fire, nearly all of the burned  
176 area occurred within protected areas: for closed-canopy pine forest, 96% of the burned area  
177 was within a protected area; for open-canopy pine forest, 91%; and for cloud forest, 91%.

178 Extent of forest loss varied substantially among protected areas for all forest types. The  
179 largest losses in pine forests occurred in José del Carmen Ramírez National Park (JC Ramírez),  
180 largely due to the large 2005 fire, followed by Sierra de Bahoruco National Park (Bahoruco) due  
181 to sources other than fire (Figs. 3 and 4; S1 File).

182 Cloud forest losses within protected areas ranged from <1 km<sup>2</sup> in Armando Bermúdez  
183 National Park to 11 km<sup>2</sup> in JC Ramírez, or 17% of that park's extant cloud forest (Fig. 5; S1  
184 File). Roughly half (51%) of the cloud forest lost in JC Ramírez was due to the same wildfires  
185 that burned through the park's pine forests. Other parks experiencing substantial loss of cloud  
186 forest were Valle Nuevo National Park, which lost 7.7 km<sup>2</sup> (4.1% of its extent in 2000), and  
187 Bahoruco, which lost 7.6 km<sup>2</sup> (8.2%). Loss of cloud forest in these two parks was driven  
188 primarily by processes other than fire (only 26.3% and 8.8%, respectively, of the deforestation in  
189 each was caused by fire).

190



191 **Table 2. Changes in the estimated areal extent of forest within formally protected areas in**  
 192 **the Dominican Republic between 2000 and 2016 for the 6 forested land-cover types**  
 193 **identified in national land-cover mapping.**

194

| Forest type (original classification name)     | Percent protected | Area (km <sup>2</sup> ), 2000 | Area lost (km <sup>2</sup> ) | Area gained (km <sup>2</sup> ) | Net change (%) | Percent loss due to fire |
|------------------------------------------------|-------------------|-------------------------------|------------------------------|--------------------------------|----------------|--------------------------|
| Closed-canopy pine (conifero denso)            | 81.6              | 1354.2                        | 126.2                        | 0.4                            | -10.3          | 47.3                     |
| Open-canopy pine (conifero abierto)            | 56.9              | 363.1                         | 49.4                         | 0.2                            | -15.7          | 54.7                     |
| Cloud forest (latifoliado nublado)             | 78.1              | 743.6                         | 39.2                         | 0.2                            | -5.5           | 20.9                     |
| Moist broadleaf (latifoliado humedo)           | 43.8              | 1122.4                        | 73.1                         | 0.5                            | -6.9           | 7.7                      |
| Semi-moist broadleaf (latifoliado semi-humedo) | 40.0              | 610.4                         | 43.3                         | 0.5                            | -7.5           | 1.2                      |
| Dry (seco)                                     | 49.1              | 1066.8                        | 43.6                         | 0.3                            | -4.2           | 1.8                      |

195

196 **Fig 3. Area of closed-canopy Hispaniolan pine (*Pinus occidentalis*) in the Dominican**  
 197 **Republic within protected areas that remained intact or was deforested (due to fire or**  
 198 **other causes) between 2000 and 2016.** Forest loss in the three most important protected  
 199 areas - all classified as national parks (IUCN Category II) and collectively accounting for 67% of  
 200 the total protected area for this forest type - varied due to the higher losses from wildfire in José  
 201 del Carmen Ramírez National Park. Loss of forest cover from other sources was similar across  
 202 the three protected areas.

203

204 **Fig 4. Area of open-canopy Hispaniolan pine (*Pinus occidentalis*) in the Dominican**  
 205 **Republic within protected areas that remained intact or was deforested (due to fire or**  
 206 **other causes) between 2000 and 2016.** Forest loss in the three most important protected  
 207 areas - all classified as national parks (IUCN Category II) and collectively accounting for 72% of  
 208 the total protected area for this forest type - varied due to the higher losses from wildfire in José  
 209 del Carmen Ramírez National Park and to deforestation from causes other than fire in Sierra de  
 210 Bahoruco National Park.

211

212 **Fig 5. Area of cloud forest in the Dominican Republic within protected areas that**  
 213 **remained intact or was deforested (due to fire or other causes) between 2000 and 2016.**  
 214 Forest loss in the eight most important protected areas - all classified as national parks (IUCN  
 215 Category II) except for Alto Bao, a forest reserve (IUCN Category V), and collectively

216 accounting for 94% of the total protected area for this forest type - was mostly due to sources  
217 other than fire. Fire was an important source of deforestation only in José del Carmen Ramírez  
218 National Park; Sierra de Bahoruco National Park and Valle Nuevo National Park both lost large  
219 areas of cloud forest from causes other than fire.

220  
221 Moist broadleaf forest losses were greatest in Los Haitises National Park, which lost 26  
222 km<sup>2</sup> (14.6%), almost all (94.2%) due to causes other than fire (Fig. 6; S1 File). Bahoruco  
223 experienced significant losses of moist broadleaf forests, too (8.6 km<sup>2</sup>, or 8.4% of the amount  
224 estimated to exist in 2000). Although fire was not generally an important cause of loss of this  
225 forest type, the 2005 fires that burned in JC Ramírez accounted for 71.4% of the observed moist  
226 broadleaf deforestation in that park, which totaled 4.1 km<sup>2</sup>.

227  
228 **Fig 6. Area of moist broadleaf forest in the Dominican Republic within protected areas**  
229 **that remained intact or was deforested (due to fire or other causes) between 2000 and**  
230 **2016.** Forest loss in the twelve most important protected areas for moist broadleaf forest, which  
231 collectively account for 75% of the total protected area for this forest type, was concentrated in a  
232 single National Park (IUCN Category II), Los Haitises, and was due almost entirely to causes  
233 other than fire.

234  
235 Loss of semi-moist broadleaf forest was most pronounced in Bahoruco (13.9 km<sup>2</sup>, or  
236 15.5% of the 2000 total extent) and Cotubanamá National Park (formerly Del Este National  
237 Park; 6 km<sup>2</sup>, or 2%; Fig. 7; S1 File). Bahoruco also led all parks in the amount of dry forest  
238 eliminated, with 7.8 km<sup>2</sup> (5.1%) lost over the course of this study (Fig. 8; S1 File). Despite its  
239 relatively small size, Cerro Chacuey Natural Reserve was another noticeable hotspot of  
240 deforestation, losing 4.7 km<sup>2</sup> or 35.2% of its extant dry forest (S1 File). Fire was unimportant as  
241 a driver of deforestation of both semi-moist broadleaf and dry forests in this study.

242  
243 **Fig 7. Area of semi-moist broadleaf forest in the Dominican Republic within protected**  
244 **areas that remained intact or was deforested (due to fire or other causes) between 2000**  
245 **and 2016.** Deforestation in semi-moist broadleaf forest was concentrated in two National Parks  
246 (IUCN Category II), Punta Espada and Sierra de Bahoruco. Collectively these four protected  
247 areas account for 75% of the total protected area for this forest type. Fire was an insignificant  
248 cause of deforestation in this forest type.

249  
250 **Fig 8. Area of dry forest in the Dominican Republic within protected areas that remained**  
251 **intact or was deforested (due to fire or other causes) between 2000 and 2016.** Loss of  
252 protected dry forest was relatively high in Sierra de Bahoruco National Park. Collectively these  
253 seven protected areas account for 72% of the total protected area for this forest type. Fire was  
254 an insignificant cause of deforestation in dry forest.

255  
256



## 257 Discussion

258 Forest cover in the DR shrank substantially between 2000 and 2016, from nearly 45% to  
259 just under 40% of its territory, an overall decline of 11.1% and an annual deforestation rate of  
260 0.7%. This rate was much higher than the 0.38% annual net rate of deforestation estimated for  
261 the tropics as a whole by Achard et al. [11] and for the mainland Neotropics in particular [27].  
262 However, our estimated deforestation rate is comparable with the long-term 0.71% annual rate  
263 of forest loss estimated for the Amazon forest of Brazil [28].

264 Other recent studies, all using satellite sensor data, have reported qualitatively similar  
265 changes: Heino et al. [21] estimated that forest cover in the DR declined by 1,863 km<sup>2</sup> between  
266 2000 and 2012 (or 7% out of an estimated total area of 26,952 km<sup>2</sup>, a ~0.6% annual decline),  
267 while Sangermano et al. [20], using a different approach, estimated a slightly slower rate of  
268 deforestation in the DR between 2000 and 2011, reporting a net loss of 518 km<sup>2</sup> (or 5.3% of  
269 total forest area, a ~ 0.5% annual decline). Furthermore, in keeping with our finding of  
270 widespread deforestation in all forest types and without respect to protected-area status, both  
271 Heino et al. [21] and Potapov et al. [10] reported significant declines in the extent of intact forest  
272 in the DR. In these studies, intact forest was defined as forest blocks > 500 km<sup>2</sup> in area and  
273 minimally influenced by human activity, essentially all of which falls within the boundaries of  
274 protected areas in the DR. Potapov et al. [10] found a 29% decline in the extent of intact forest  
275 in the DR between 2000 and 2013, mostly due to losses caused by fire, whereas Heino et al.  
276 [21] estimated an 8.6% decline in intact forest.

277 In contrast to these trends, the Food and Agriculture Organization (FAO), using reports  
278 provided by the government of the DR, reported a 33.4% increase in forest cover between 2000  
279 and 2015, an annual gain of 1.9% (FAO 2015). The methodology underlying this estimate is not  
280 identified in the FAO report, but it was probably derived from the national land-cover and  
281 vegetation maps produced by the Ministry of the Environment of the DR every few years.  
282 Elsewhere, national reports used by the FAO have been criticized as unreliable [29] and several  
283 studies have documented significant discrepancies between international estimates and  
284 nationally reported estimates of forest loss [9,30]. Furthermore, Romijn et al. [31] rated as low  
285 the capacity of the DR to carry out forest inventories and to monitor change in forest area, both  
286 of which are essential in generating reliable national reports on forest change. Given this, and  
287 given the consistency of estimates produced by international studies, we consider it unlikely that  
288 reforestation exceeded deforestation and instead have high confidence that the total area of  
289 forest in the DR declined from 2000-2016.

290 One possible source of error in our estimates of net deforestation is that our estimates of  
291 gain in the area of each forest type apply only to pixels falling within the mapped distribution of  
292 each forest type. Because we based our estimates of change in each forest type on its 1996  
293 mapped distribution, we cannot rule out the possibility that areas categorized as another land-  
294 cover type in 1996 (e.g., subsistence agriculture) could have regrown into one of the forest  
295 types we analyzed. This would not have been captured by our analysis, thus leading us to  
296 underestimate forest gains during the period. However, the total gain in tree cover across all of  
297 the agricultural or otherwise anthropogenic land-cover types in the 1996 land-cover map was  
298 only 24 km<sup>2</sup>, so even if all of this gain reflected reversion to native forest cover, which is unlikely,  
299 it would account for only a small fraction of the 874 km<sup>2</sup> of forest lost. Thus, we are confident

300 that afforestation of agricultural or developed lands could not have materially affected our  
301 estimates of net loss.

302 As has been reported in other studies of deforestation in the Neotropics [30,32], we also  
303 found that deforestation in the DR tended to accelerate over time, with the exception of dry  
304 forest loss, which showed some evidence of a decline in the extent of deforestation after 2010.  
305 This slowing deforestation rate in dry forests could be because of the substitution of propane  
306 gas for wood charcoal – the main historical use of dry-forest trees – as the primary cooking fuel  
307 in the DR [33], a phenomenon also observed in Puerto Rico [34]. Charcoal trade went from  
308 roughly 1.6 million sacks in 1982 to just 49,000 in 2005, and its use as cooking fuel went from  
309 90% of households in 1980 to just 10% in 2006 [35]. Although there are still some hotspots of  
310 illegal charcoal trade [36], especially in areas near the border with Haiti, quantifying its  
311 importance is difficult. Nonetheless, the widespread shift away from charcoal as the leading  
312 cooking fuel in the DR likely explains much of the observed drop in dry-forest deforestation  
313 rates.

## 314 **Loss by forest type and drivers**

315 Outside of areas known to have burned, the data that we used do not provide direct  
316 insight into the drivers of forest loss. However, we can reasonably speculate that, with the  
317 exception of pine forests, the most likely cause for the observed forest loss is expanding  
318 agriculture. This is not only consistent with our field observations, but also in agreement with the  
319 findings from a comprehensive, national-level assessment which ranked agriculture as the  
320 leading cause of deforestation, accounting for 55% of forest loss in the DR [37]. In comparison,  
321 the same study attributed only 26% of deforestation to timber harvesting, firewood collection,  
322 and wood-charcoal production.

323 The important role of agriculture in forest clearing in two montane national parks has  
324 also been highlighted in recent reports by Wooding and Morales [38] for Nalga de Maco  
325 National Park and León et al. [39] for Sierra de Bahoruco National Park. Both studies describe  
326 the expansion of a similar commercial agricultural system, consisting of sharecropping in a  
327 shifting-agriculture system established between a landless Haitian farmer and a Dominican who  
328 claims land ownership. Sharing arrangements can vary, but usually the farmer keeps most of  
329 the crop, which is typically short-cycle crops. León et al. [39] also described the recent  
330 establishment of more permanent forest conversion in the form of avocados (*Persea americana*)  
331 grown for export, plantations of which have actively expanded inside Sierra de Bahoruco  
332 National Park since 2008. The problem of agriculture within protected areas is not limited to  
333 montane parks, however; a study on the drivers of deforestation in the low-elevation Los  
334 Haitises National Park also identified farming as the leading cause. In this case, deforestation  
335 was driven by increased exports of taro root (*Colocasia esculenta*), the leading crop inside the  
336 Park [40].

337 Fire was the leading cause of forest-cover decline in Hispaniolan pine forests. Pine trees  
338 and their associated understory plants are not only resilient to fire, but depend on it for seed  
339 dispersal and germination [41] and thus, absent any additional disturbance, burned pinelands  
340 will likely recover [42]. Of concern, however, is evidence of emerging changes in fire regime that  
341 may pose a long-term threat to these forests. Whereas lightning during dry seasons was

342 probably the leading cause of fire ignition in the past, today human activities are. The DR's  
343 National Fire Management Strategy has identified as the leading causes of forest fires, in order  
344 of importance: farming activities (especially land preparation for short-cycle crops), renewal of  
345 cattle grazing pastures, intentional fires in protest against authorities, and accidental fires  
346 caused by abandoned cooking fires from hunters and parrot poachers [43]. Furthermore, the  
347 strategy highlights a new and complex threat: the expansion of the invasive molasses grass  
348 (*Melinis minutiflora*), which is highly flammable and has already been implicated in forest fires  
349 [43]. Changes in the seasonality, frequency, or intensity of fire may negatively affect even  
350 relatively resilient pine forests, let alone broadleaf forests that are ill-adapted to fire.

351 Cloud forest also experienced substantial losses due to fire. However, unlike pine forest,  
352 it is far less resilient to fire. Not only is cloud forest exceedingly slow to recover after fire [44],  
353 but exposure to repeated fire can lead to its replacement by other forest types [42]. The fire-  
354 related losses of cloud forest that we documented, therefore, may be permanent. This is very  
355 concerning as these montane forests not only host most of the unique, threatened species on  
356 the island, but also intercept water from rain and clouds year-round (e.g., [45]), allowing lowland  
357 human communities to thrive even in extremely dry areas. The 2005 fires that produced most of  
358 the fire-related deforestation in pine and cloud forests were exacerbated by drought conditions  
359 brought about by an El Niño event in late 2004 [24]. The climate of the DR is expected to grow  
360 warmer and drier under most scenarios of climate change [46], raising the possibility that fire -  
361 probably historically unimportant as a driver of change in cloud forest [24] - may become a far  
362 more important threat to cloud forest in the future.

## 363 **The impact of protected areas**

364 Protected areas lost less tree cover than did unprotected areas, as has been shown  
365 previously both in the DR [20] and in other parts of the world [47–50]. However, protected areas  
366 also varied in terms of the degree of protection they afforded. Three mountain-based National  
367 Parks in particular - Sierra de Bahuco, José del Carmen Ramirez, and Valle Nuevo - exhibited  
368 consistently high rates of deforestation across multiple forest types. A fourth National Park, Los  
369 Haitises, located at sea level, had notably high rates of deforestation in its predominant forest  
370 type, moist broadleaf forest. These four areas all share a common problem: expanding  
371 agriculture or cattle ranching operations. These activities are feasible in these protected areas  
372 because they have a relatively humid climate, and in the case of the three mountain parks,  
373 milder temperatures, conditions which allow for profitable farming operations without expensive  
374 watering systems. This is consistent with a recent global study on protected areas under  
375 pressure, which estimated that 21% of land within protected areas in the DR faced intense  
376 human pressure [51]. The low management effectiveness in some of the DR's protected areas  
377 was also highlighted by a report from Sánchez [52], in which he measured a number of key  
378 management variables for the leading 35 protected areas (out of a total of 118 areas at the  
379 time). Of these, only four obtained a satisfactory management score (above 75%). Of the  
380 remaining 31 areas that failed to receive a passing score, ten showed evidence of ongoing  
381 decline in management effectiveness during the course of the three-year study. The lack of  
382 basic management attributes such as clear knowledge of protected area boundaries and the  
383 existence of management plans drove most of these low scores. From our observations in the

384 field, besides a limited capacity to enforce existing protected-area laws, political patronage, local  
385 power structures, and corruption also play a role in limiting the effectiveness of protected areas.

386 Our findings also suggest that protected areas were more effective in reducing  
387 deforestation at lower elevations, particularly in dry forest. However, this could be attributed to  
388 several factors besides protection status, including the shift away from wood charcoal as  
389 cooking fuel in the DR, as well as the limitations that local climatic conditions impose on the  
390 development of agriculture and cattle ranching. These activities are only possible in dry forest  
391 sites with abundant, nearby freshwater resources, and often only after sizeable investments in  
392 irrigation infrastructure. Financing such investments often requires land titles, which can be  
393 difficult to obtain in legally protected areas. This agrees with the findings of Joppa and Pfaff [48],  
394 who also found that protected areas appear more secure when established in areas not highly  
395 valued for extractive resource uses. The apparently greater effectiveness of protected areas in  
396 areas of dry forest in the DR may thus simply reflect the low profitability of exploiting the  
397 resources that they contain, in contrast to the relatively lucrative opportunities afforded by the  
398 export-oriented agriculture that can be carried out in protected areas with more suitable climatic  
399 conditions.

## 400 **Policy implications**

401 Although not typically considered a hotspot of deforestation, rates of forest loss in the  
402 DR are higher than regional averages and show no sign of decelerating. Our results reveal  
403 ongoing deforestation across the country, especially in moist forest types that are more valuable  
404 for agricultural development. Protected areas offered only modest reductions in deforestation for  
405 most forest types, highlighting a general lack of management effectiveness. As nations continue  
406 to expand their protected-area systems, there is an urgent need to undertake objective  
407 assessments of their effectiveness in meeting their goals, especially those pertaining to forest  
408 conservation. Satellite images and forest-cover analysis platforms, such as Global Forest  
409 Watch, offer an inexpensive and objective way to achieve this.

410 Continued deforestation in the DR poses a risk to the flow of critical ecosystem services,  
411 especially the provision of water by upland forests to lowland human communities, including the  
412 major cities and agricultural regions. Ongoing deforestation will also threaten the achievement  
413 of a number of the DR's sustainable development goals, as well as meeting its Intended  
414 Nationally Determined Contribution under the Paris Agreement within the United Nations  
415 Framework Convention on Climate Change (UNFCCC). Widespread forest loss will also hinder  
416 the DR's commitments to halt biodiversity loss as a party to the Convention on Biological  
417 Diversity, by placing at greater risk many unique, globally threatened species that depend on  
418 the country's forests.

419 Addressing deforestation will require a better understanding of its causes. Although fire  
420 is an important driver of loss of forest cover in Hispaniolan pine forest, and occasionally in  
421 adjacent cloud forest, the vast majority of deforestation is driven by clearing for agricultural  
422 production [53]. More research into the local drivers of deforestation, its key actors, and  
423 associated social dynamics are needed. Efforts to stem deforestation will almost certainly  
424 involve stricter limits on large-scale agricultural commodity production within protected areas  
425 and the development of alternative livelihood opportunities for those practicing shifting

426 agriculture. Shifting agriculture is in great part enabled by customary systems of land tenure in  
427 many rural areas of the DR that persist despite contravening laws and policies established by  
428 the central government. The critical role of land tenure in reducing deforestation, particularly  
429 under the REDD+ (Reducing Emissions from Deforestation and Forest Degradation)  
430 mechanism of the UNFCCC has been highlighted by a growing number of studies around the  
431 world [e.g., 54,55]. Addressing these issues is not easy, but will be crucial for securing the  
432 future of forests in the DR and in many other countries facing similar development pressures.

## 433 **Acknowledgements**

434

## 435 **References**

- 436 1. Angelsen A, Jagger P, Babigumira R, Belcher B, Hogarth NJ, Bauch S, et al. Environmental  
437 income and rural livelihoods: a global-comparative analysis. *World Dev.* 2014;64: S12–S28.  
438 doi:10.1016/j.worlddev.2014.03.006
- 439 2. FAO. Contribution of the Forestry Sector to National Economies, 1990-2011. Forest  
440 Finance Working Paper FSFM/ACC/09 [Internet]. Lebedys A, Li Y, editors. Rome: Food  
441 and Agriculture Organization of the United Nations; 2014. Available: [http://www.fao.org/3/a-](http://www.fao.org/3/a-i4248e.pdf)  
442 [i4248e.pdf](http://www.fao.org/3/a-i4248e.pdf)
- 443 3. Sterling SM, Ducharme A, Polcher J. The impact of global land-cover change on the  
444 terrestrial water cycle. *Nat Clim Chang.* 2013;3: 385.
- 445 4. Bormann FH, Likens GE, Siccama TG, Pierce RS, Eaton JS. The export of nutrients and  
446 recovery of stable conditions following deforestation at Hubbard Brook. *Ecol Monogr.*  
447 1974;44: 255–277. doi:10.2307/2937031
- 448 5. Alkama R, Cescatti A. Biophysical climate impacts of recent changes in global forest cover.  
449 *Science.* 2016;351: 600–604. doi:10.1126/science.aac8083
- 450 6. Dixon RK, Solomon AM, Brown S, Houghton RA, Trexler MC, Wisniewski J. Carbon pools  
451 and flux of global forest ecosystems. *Science.* 1994;263: 185–190.  
452 doi:10.1126/science.263.5144.185
- 453 7. Bala G, Caldeira K, Wickett M, Phillips TJ, Lobell DB, Delire C, et al. Combined climate and  
454 carbon-cycle effects of large-scale deforestation. *Proc Natl Acad Sci USA.* 2007;104: 6550–  
455 6555. doi:10.1073/pnas.0608998104
- 456 8. Steffen W, Richardson K, Rockström J, Cornell SE, Fetzer I, Bennett EM, et al.  
457 Sustainability. Planetary boundaries: guiding human development on a changing planet.  
458 *Science.* 2015;347: 1259855. doi:10.1126/science.1259855
- 459 9. Hansen MC, Potapov PV, Moore R, Hancher M, Turubanova SA, Tyukavina A, et al. High-  
460 resolution global maps of 21st-century forest cover change. *Science.* 2013;342: 850–853.  
461 doi:10.1126/science.1244693



- 462 10. Potapov P, Hansen MC, Laestadius L, Turubanova S, Yaroshenko A, Thies C, et al. The  
463 last frontiers of wilderness: tracking loss of intact forest landscapes from 2000 to 2013.  
464 *Science Advances*. 2017;3: e1600821. doi:10.1126/sciadv.1600821
- 465 11. Achard F, Beuchle R, Mayaux P, Stibig H-J, Bodart C, Brink A, et al. Determination of  
466 tropical deforestation rates and related carbon losses from 1990 to 2010. *Glob Chang Biol*.  
467 2014;20: 2540–2554. doi:10.1111/gcb.12605
- 468 12. Richards DR, Friess DA. Rates and drivers of mangrove deforestation in Southeast Asia,  
469 2000–2012. *Proc Natl Acad Sci USA*. 2016;113: 344–349.
- 470 13. Donald PF, Round PD, Dai We Aung T, Grindley M, Steinmetz R, Shwe NM, et al. Social  
471 reform and a growing crisis for southern Myanmar’s unique forests. *Conserv Biol*. 2015;29:  
472 1485–1488. doi:10.1111/cobi.12501
- 473 14. Rockström J, Steffen W, Noone K, Persson Å, Chapin FS, Lambin E, et al. Planetary  
474 boundaries: Exploring the safe operating space for humanity. *Ecol Soc*. 2009;14: 32.
- 475 15. United Nations General Assembly. Transforming our world: the 2030 Agenda for  
476 Sustainable Development. United Nations; 2015. Report No.: A/RES/70/1.
- 477 16. World Bank. Dominican Republic. Overview [Internet]. 2018 [cited 11 Dec 2018]. Available:  
478 [www.worldbank.org/en/country/dominicanrepublic/overview](http://www.worldbank.org/en/country/dominicanrepublic/overview)
- 479 17. Myers N, Mittermeier RARA, Mittermeier CG, da Fonseca GAB, Kent J, Fonseca GAB, et  
480 al. Biodiversity hotspots for conservation priorities. *Nature*. 2000;403: 853–858.  
481 doi:10.1038/35002501
- 482 18. Billington C, Harcourt CS, Sayer J. The conservation atlas of tropical forests: the Americas.  
483 New York, NY: Simon & Schuster Macmillan; 1996.
- 484 19. Ministerio de Medio Ambiente y Recursos Naturales de la República Dominicana. Lista de  
485 especies en peligro de extinción, amenazadas o protegidas de la República Dominicana  
486 (Lista Roja). Santo Domingo: Ministerio de Medio Ambiente y Recursos Naturales de la  
487 República Dominicana; 2011.
- 488 20. Sangermano F, Bol L, Galvis P, Gullison RE, Hardner J, Ross GS. Habitat suitability and  
489 protection status of four species of amphibians in the Dominican Republic. *Appl Geogr*.  
490 2015;63: 55–65. doi:10.1016/j.apgeog.2015.06.002
- 491 21. Heino M, Kumm M, Makkonen M, Mulligan M, Verburg PH, Jalava M, et al. Forest Loss in  
492 Protected Areas and Intact Forest Landscapes: A Global Analysis. *PLoS One*. 2015;10:  
493 e0138918. doi:10.1371/journal.pone.0138918
- 494 22. Gorelick N, Hancher M, Dixon M, Ilyushchenko S, Thau D, Moore R. Google Earth Engine:  
495 Planetary-scale geospatial analysis for everyone. *Remote Sens Environ*. 2017;202: 18–27.  
496 doi:10.1016/j.rse.2017.06.031
- 497 23. Tolentino L, Peña M. Inventario de la vegetacion y uso de la tierra en la Republica  
498 Dominicana. *Moscosa*. 1998;10: 179–203.
- 499 24. Sherman RE, Martin PH, Fahey TJ, Degloria SD. Fire and vegetation dynamics in high-  
500 elevation neotropical montane forests of the Dominican Republic. *Ambio*. 2008;37: 535–



- 501            541.
- 502    25. Giglio L, Justice C, Boschetti L, Roy D. MCD64A1 MODIS/Terra+Aqua Burned Area  
503            Monthly L3 Global 500m SIN Grid V006 [Data set] [Internet]. NASA EOSDIS Land  
504            Processes DAAC; 2015. doi:10.5067/MODIS/MCD64A1.006
- 505    26. UNEP-WCMC. Protected Area Profile for Dominican Republic from the World Database of  
506            Protected Areas, December 2018 [Internet]. 2018 [cited 11 Dec 2018]. Available:  
507            [www.protectedplanet.net](http://www.protectedplanet.net)
- 508    27. Achard F, Eva HD, Stibig H-J, Mayaux P, Gallego J, Richards T, et al. Determination of  
509            deforestation rates of the world's humid tropical forests. *Science*. 2002;297: 999–1002.  
510            doi:10.1126/science.1070656
- 511    28. Gomez V, Beuchle R, Shimabukuro Y, Grecchi R, Simonetti D, Eva HD, et al. A long-term  
512            perspective on deforestation rates in the Brazilian Amazon. *International Archives of the  
513            Photogrammetry, Remote Sensing and Spatial Information Sciences*. 2015;40: 539–544.  
514            doi:10.5194/isprsarchives-XL-7-W3-539-2015
- 515    29. Grainger A. Difficulties in tracking the long-term global trend in tropical forest area. *Proc  
516            Natl Acad Sci USA*. 2008;105: 818–823. doi:10.1073/pnas.0703015105
- 517    30. Kim D-H, Sexton JO, Townshend JR. Accelerated deforestation in the humid tropics from  
518            the 1990s to the 2000s. *Geophysical Research Letters*. 2015;42: 3495–3501.
- 519    31. Romijn E, Lantican CB, Herold M, Lindquist E, Ochieng R, Wijaya A, et al. Assessing  
520            change in national forest monitoring capacities of 99 tropical countries. *For Ecol Manage*.  
521            2015;352: 109–123. doi:10.1016/j.foreco.2015.06.003
- 522    32. Eva HD, Achard F, Beuchle R, De Miranda E, Carboni S, Seliger R, et al. Forest cover  
523            changes in tropical South and Central America from 1990 to 2005 and related carbon  
524            emissions and removals. *Remote Sensing*. 2012;4: 1369–1391.
- 525    33. Díaz-Beard R, Hernández A. Estudio del sector forestal de la República Dominicana.  
526            Análisis participativo de los programas forestales nacionales en los países de América  
527            Latina y formulación de recomendaciones a niveles nacional, regional e internacional  
528            [Internet]. 2006 [cited 11 Dec 2018]. Available:  
529            [www.cedaf.org.do/eventos/forestal/estudio\\_rd/estudio\\_sector\\_forestal\\_rdp.pdf](http://www.cedaf.org.do/eventos/forestal/estudio_rd/estudio_sector_forestal_rdp.pdf)
- 530    34. May T. Effets contrastés des prélèvements de bois sur la végétation de forêt sèche en zone  
531            frontalière dominico-haïtienne: comment les interpréter? *Bois et Forêts de Tropiques*.  
532            2015;326: 3-13.
- 533    35. Colón SM, Lugo AE. Recovery of a subtropical dry forest after abandonment of different  
534            land uses. *Biotropica*. 2006 May;38(3):354-64.
- 535    36. Pasachnik SA, Carreras De León R, León YM. Protected only on paper? Three case  
536            studies from protected areas in the Dominican Republic. *Caribbean Naturalis*. 2016;30: 1–  
537            19.
- 538    37. Ovalles PJ. Identificación de las causas de la deforestación y la degradación de los  
539            bosques en la República Dominicana. Programa REDDCCAD/GIZ en Centroamérica y

- 540 República Dominicana; 2011.
- 541 38. Wooding B, Morales M. Migración y sostenibilidad ambiental en Hispaniola [Internet]. Santo  
542 Domingo: Editora Búho; 2014. Available:  
543 [http://obmica.org/index.php/publicaciones/libros/94-migracion-y-sostenibilidad-ambiental-](http://obmica.org/index.php/publicaciones/libros/94-migracion-y-sostenibilidad-ambiental-en-hispaniola)  
544 [en-hispaniola](http://obmica.org/index.php/publicaciones/libros/94-migracion-y-sostenibilidad-ambiental-en-hispaniola)
- 545 39. León YM, Garrido E, Almonte J. Monitoring and mapping broadleaf mountain forests of  
546 southern Sierra de Bahoruco, Dominican Republic [Internet]. 2013. Available:  
547 [http://www.grupojaragua.org.do/documents/Informe\\_MonitoreoBicknell\\_BahorucoS\\_GJ201](http://www.grupojaragua.org.do/documents/Informe_MonitoreoBicknell_BahorucoS_GJ2012-2013_ENGLISH_ed.pdf)  
548 [2-2013\\_ENGLISH\\_ed.pdf](http://www.grupojaragua.org.do/documents/Informe_MonitoreoBicknell_BahorucoS_GJ2012-2013_ENGLISH_ed.pdf)
- 549 40. Gesto de Jesús EM. Motores de deforestación en el Parque Nacional Los Haitises y uso de  
550 hábitat de anidación del Gavilán de la Española (*Buteo ridgwayi*), República Dominicana.  
551 MS, Centro Agronómico Tropical de Investigación y Enseñanza (CATIE), Turrialba.  
552 Available at: <http://repositorio.bibliotecaorton.catie.ac.cr/handle/11554/8601>. 2016.
- 553 41. Kennedy LM, Horn SP. Postfire vegetation recovery in highland pine forests of the  
554 dominican republic. *Biotropica*. 2008;40: 412–421. doi:10.1111/j.1744-7429.2007.00394.x
- 555 42. Myers R, O'Brien J, Mehlman D, Bergh C. Fire management assessment of the highland  
556 ecosystems of the Dominican Republic. GFI Publication No. 2004-2. The Nature  
557 Conservancy, Arlington, VA. 2004. Available:  
558 [https://www.conservationgateway.org/Files/Pages/fire-management-](https://www.conservationgateway.org/Files/Pages/fire-management-assessmen.aspx)  
559 [assessmen.aspx168.aspx](https://www.conservationgateway.org/Files/Pages/fire-management-assessmen.aspx)
- 560 43. Secretaría de Estado de Medio Ambiente y Recursos Naturales de la República  
561 Dominicana. Estrategia nacional de gestión y manejo del fuego para la República  
562 Dominicana 2007-2011. Santo Domingo: Secretaría de Estado de Medio Ambiente y  
563 Recursos Naturales de la República Dominicana; 2007.
- 564 44. May T. Five years of post-fire vegetation succession in a Caribbean cloud forest (Cordillera  
565 Central, Dominican Republic). *Ecotropica*. 2000;6: 117–127.
- 566 45. Holwerda F, Bruijnzeel LA, Muñoz-Villers LE. Rainfall and cloud water interception in  
567 mature and secondary lower montane cloud forests of central Veracruz, Mexico. *Journal of*  
568 *Hydrology*. 2010;384: 84-96.
- 569 46. Nurse LA, McLean RF, Agard J, Briguglio LP, Duvat-Magnan V, Pelesikoti N, et al. Small  
570 islands. In: Barros VR, Field CB, Dokken DJ, Mastrandrea MD, Mach KJ, Bilir TE, et al.,  
571 editors. *Climate Change 2014: Impacts, Adaptation, and Vulnerability Part B: Regional*  
572 *Aspects Contribution of Working Group II to the Fifth Assessment Report of the*  
573 *Intergovernmental Panel on Climate Change*. Cambridge, United Kingdom, and New York,  
574 NY, USA: Cambridge University Press; 2014. pp. 1613–1654.  
575 doi:10.1080/20009666.2017.1314124
- 576 47. Andam KS, Ferraro PJ, Pfaff A, Sanchez-Azofeifa GA, Robalino JA. Measuring the  
577 effectiveness of protected area networks in reducing deforestation. *Proc Natl Acad Sci*  
578 *USA*. 2008;105: 16089–16094. doi:10.1073/pnas.0800437105
- 579 48. Joppa LN, Pfaff A. Global protected area impacts. *Proc Biol Sci*. 2011;278: 1633–1638.  
580 doi:10.1098/rspb.2010.1713

- 581 49. Gaveau DLA, Epting J, Lyne O, Linkie M, Kumara I, Kanninen M, et al. Evaluating whether  
582 protected areas reduce tropical deforestation in Sumatra. *J Biogeogr.* 2009;36: 2165–2175.  
583 doi:10.1111/j.1365-2699.2009.02147.x
- 584 50. Geldmann J, Barnes M, Coad L, Craigie ID, Hocking M, Burgess ND. Effectiveness of  
585 terrestrial protected areas in reducing habitat loss and population declines. *Biological*  
586 *Conservation.* 2013;161: 230–238.
- 587 51. Jones KR, Venter O, Fuller RA, Allan JR, Maxwell SL, Negret PJ, et al. One-third of global  
588 protected land is under intense human pressure. *Science.* 2018;360: 788–791.  
589 doi:10.1126/science.aap9565
- 590 52. Sánchez RO. Análisis de Resultados de la Aplicación de la Metodología Efectividad de  
591 Manejo de Áreas Protegidas (METT) en República Dominicana: Comparación 2009-2012.  
592 Ministerio de Medio Ambiente y Recursos Naturales y Programa de las Naciones Unidas  
593 para el Medio Ambiente; 2013.
- 594 53. Curtis PG, Slay CM, Harris NL, Tyukavina A, Hansen MC. Classifying drivers of global  
595 forest loss. *Science.* 2018;361: 1108–1111. doi:10.1126/science.aau3445
- 596 54. Sunderlin WD, de Sassi C, Sills EO, Duchelle AE, Larson AM, Resosudarmo IAP, et al.  
597 Creating an appropriate tenure foundation for REDD+: The record to date and prospects for  
598 the future. *World Dev.* 2018;106: 376–392. doi:10.1016/j.worlddev.2018.01.010
- 599 55. Samndong RA, Vatn A. Competing tenures: implications for redd+ in the democratic  
600 republic of congo. *For Trees Livelihoods.* 2018;9: 662. doi:10.3390/f9110662

601  
602  
603  
604  
605  
606  
607  
608  
609  
610

611 **Supporting information**  
612 **S1 File. Change in extent of major upland forest types**  
613 **within protected areas in the Dominican Republic,**  
614 **2000-2016.**

bioRxiv preprint doi: <https://doi.org/10.1101/558346>; this version posted February 22, 2019. The copyright holder for this preprint (which was not certified by peer review) is the author/funder, who has granted bioRxiv a license to display the preprint in perpetuity. It is made available under aCC-BY 4.0 International license.

Forest area (km<sup>2</sup>) lost

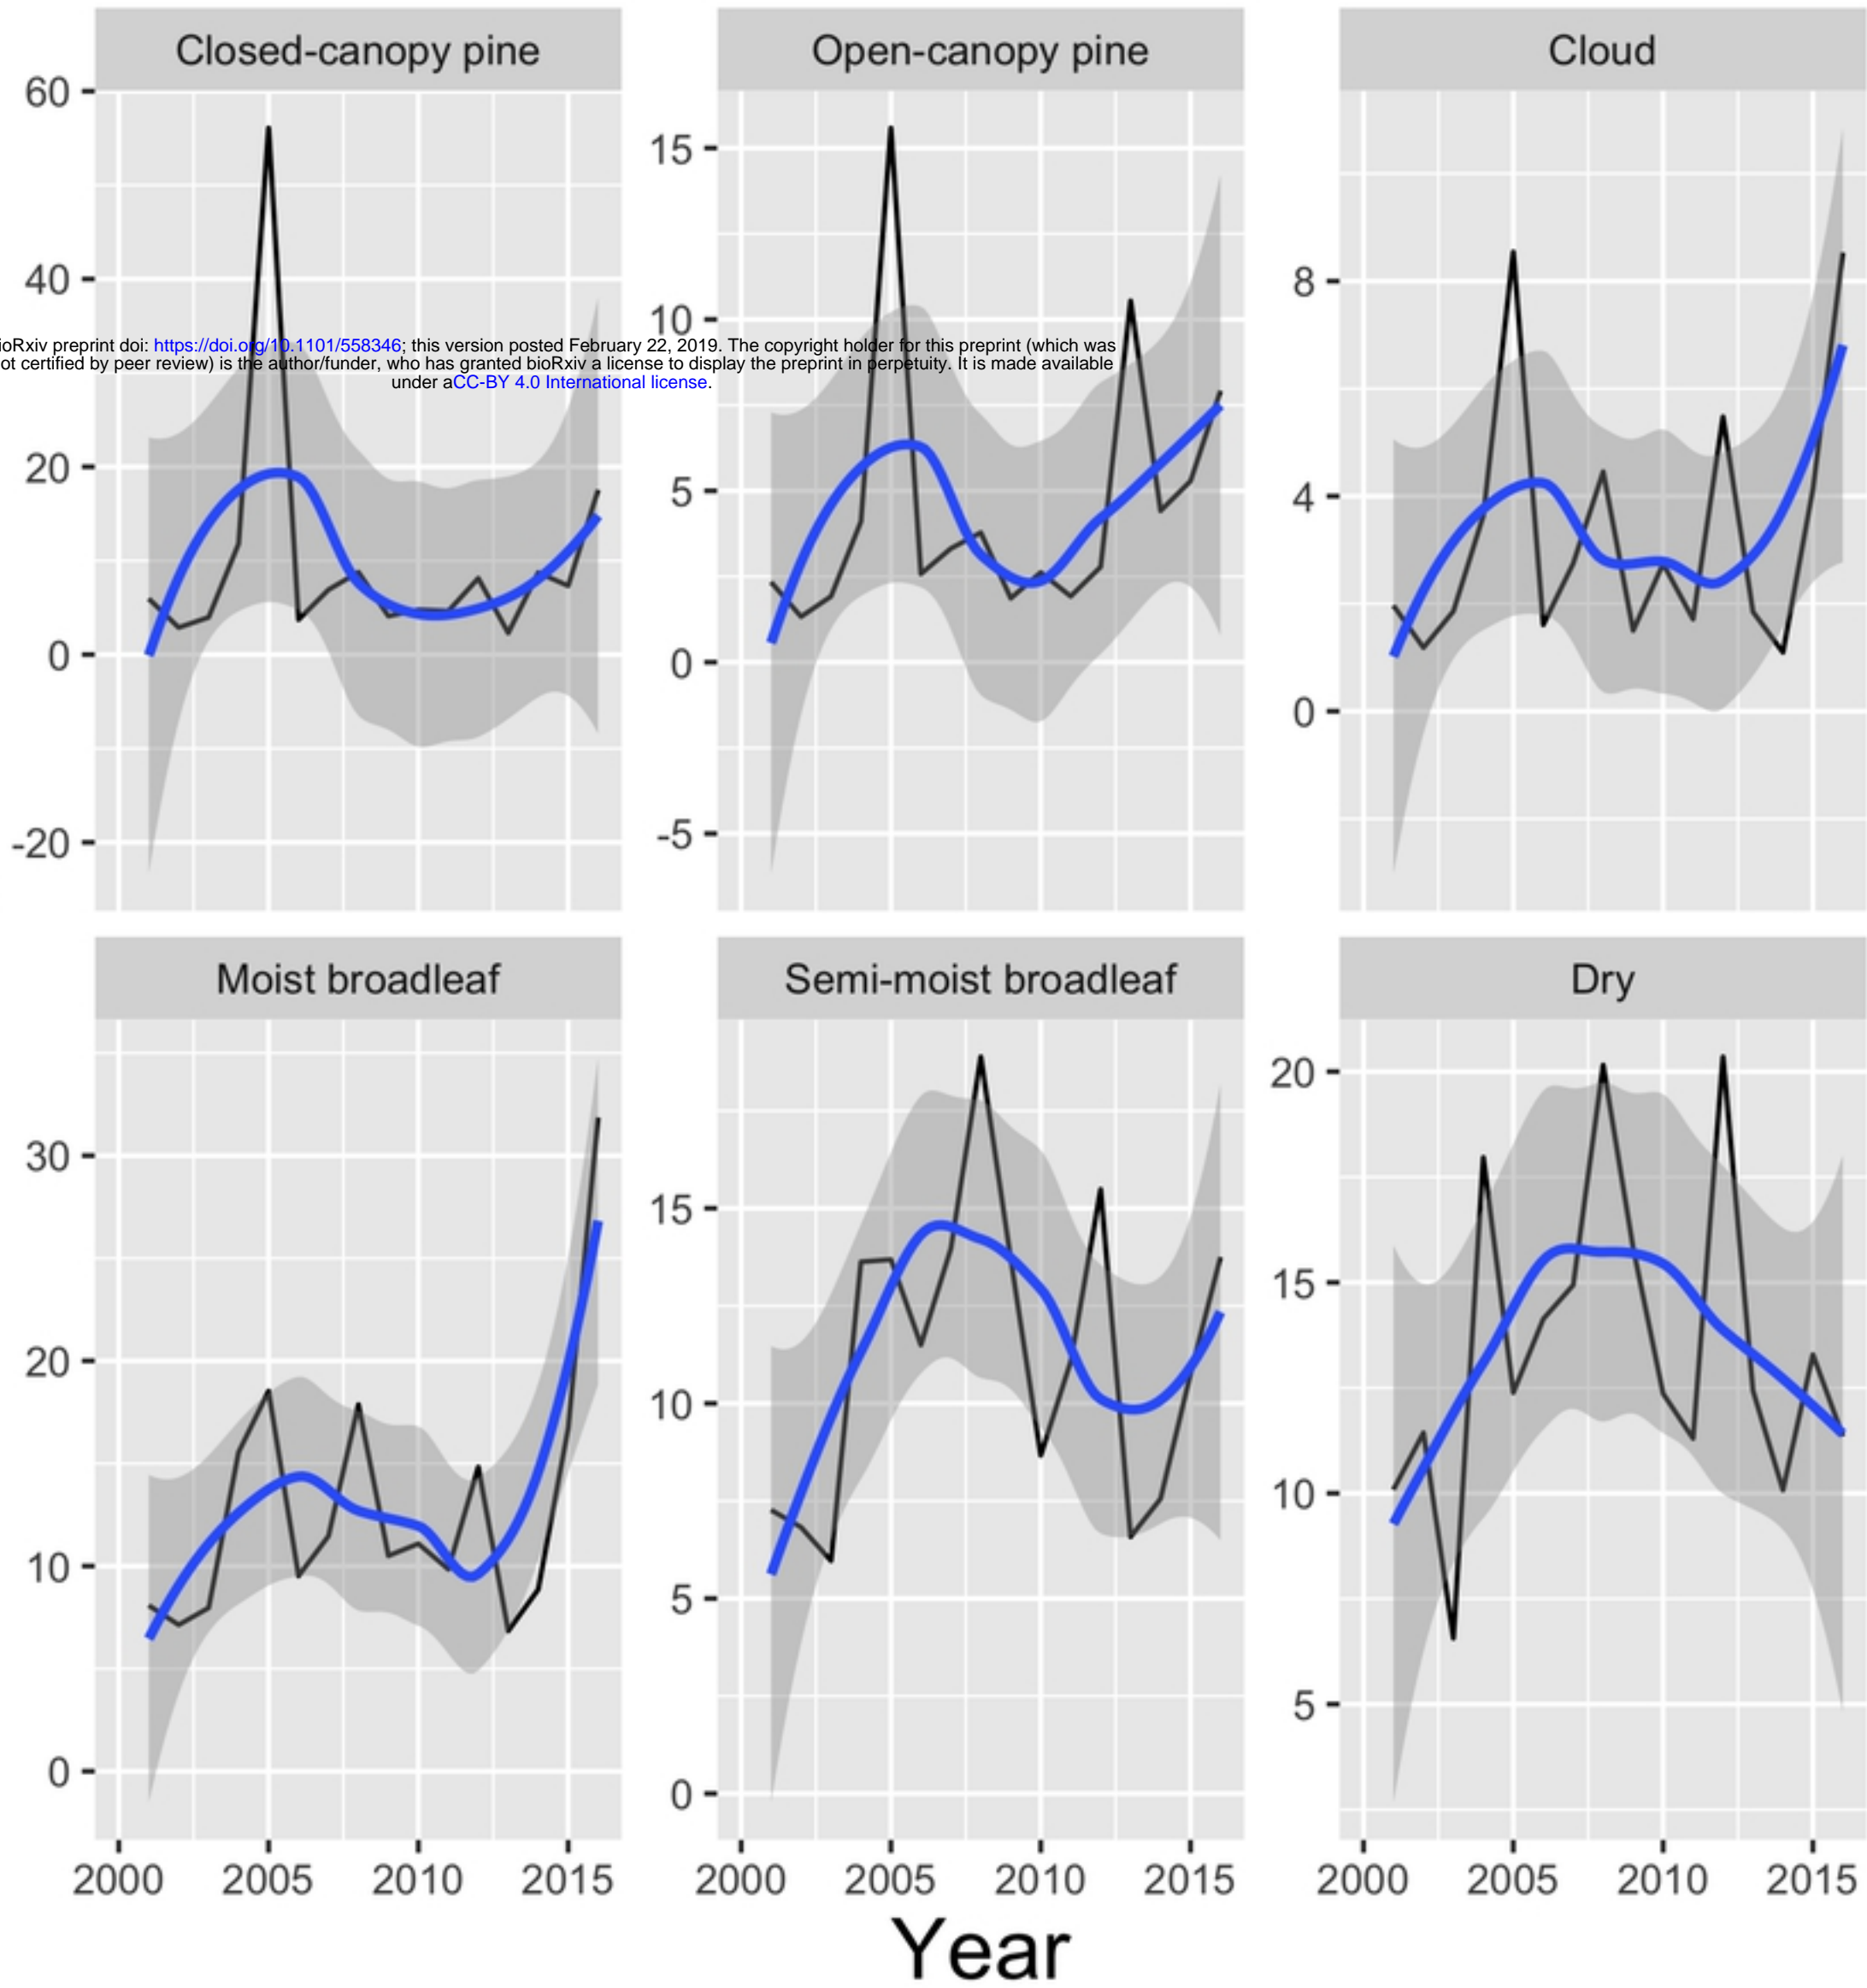

Figure 1

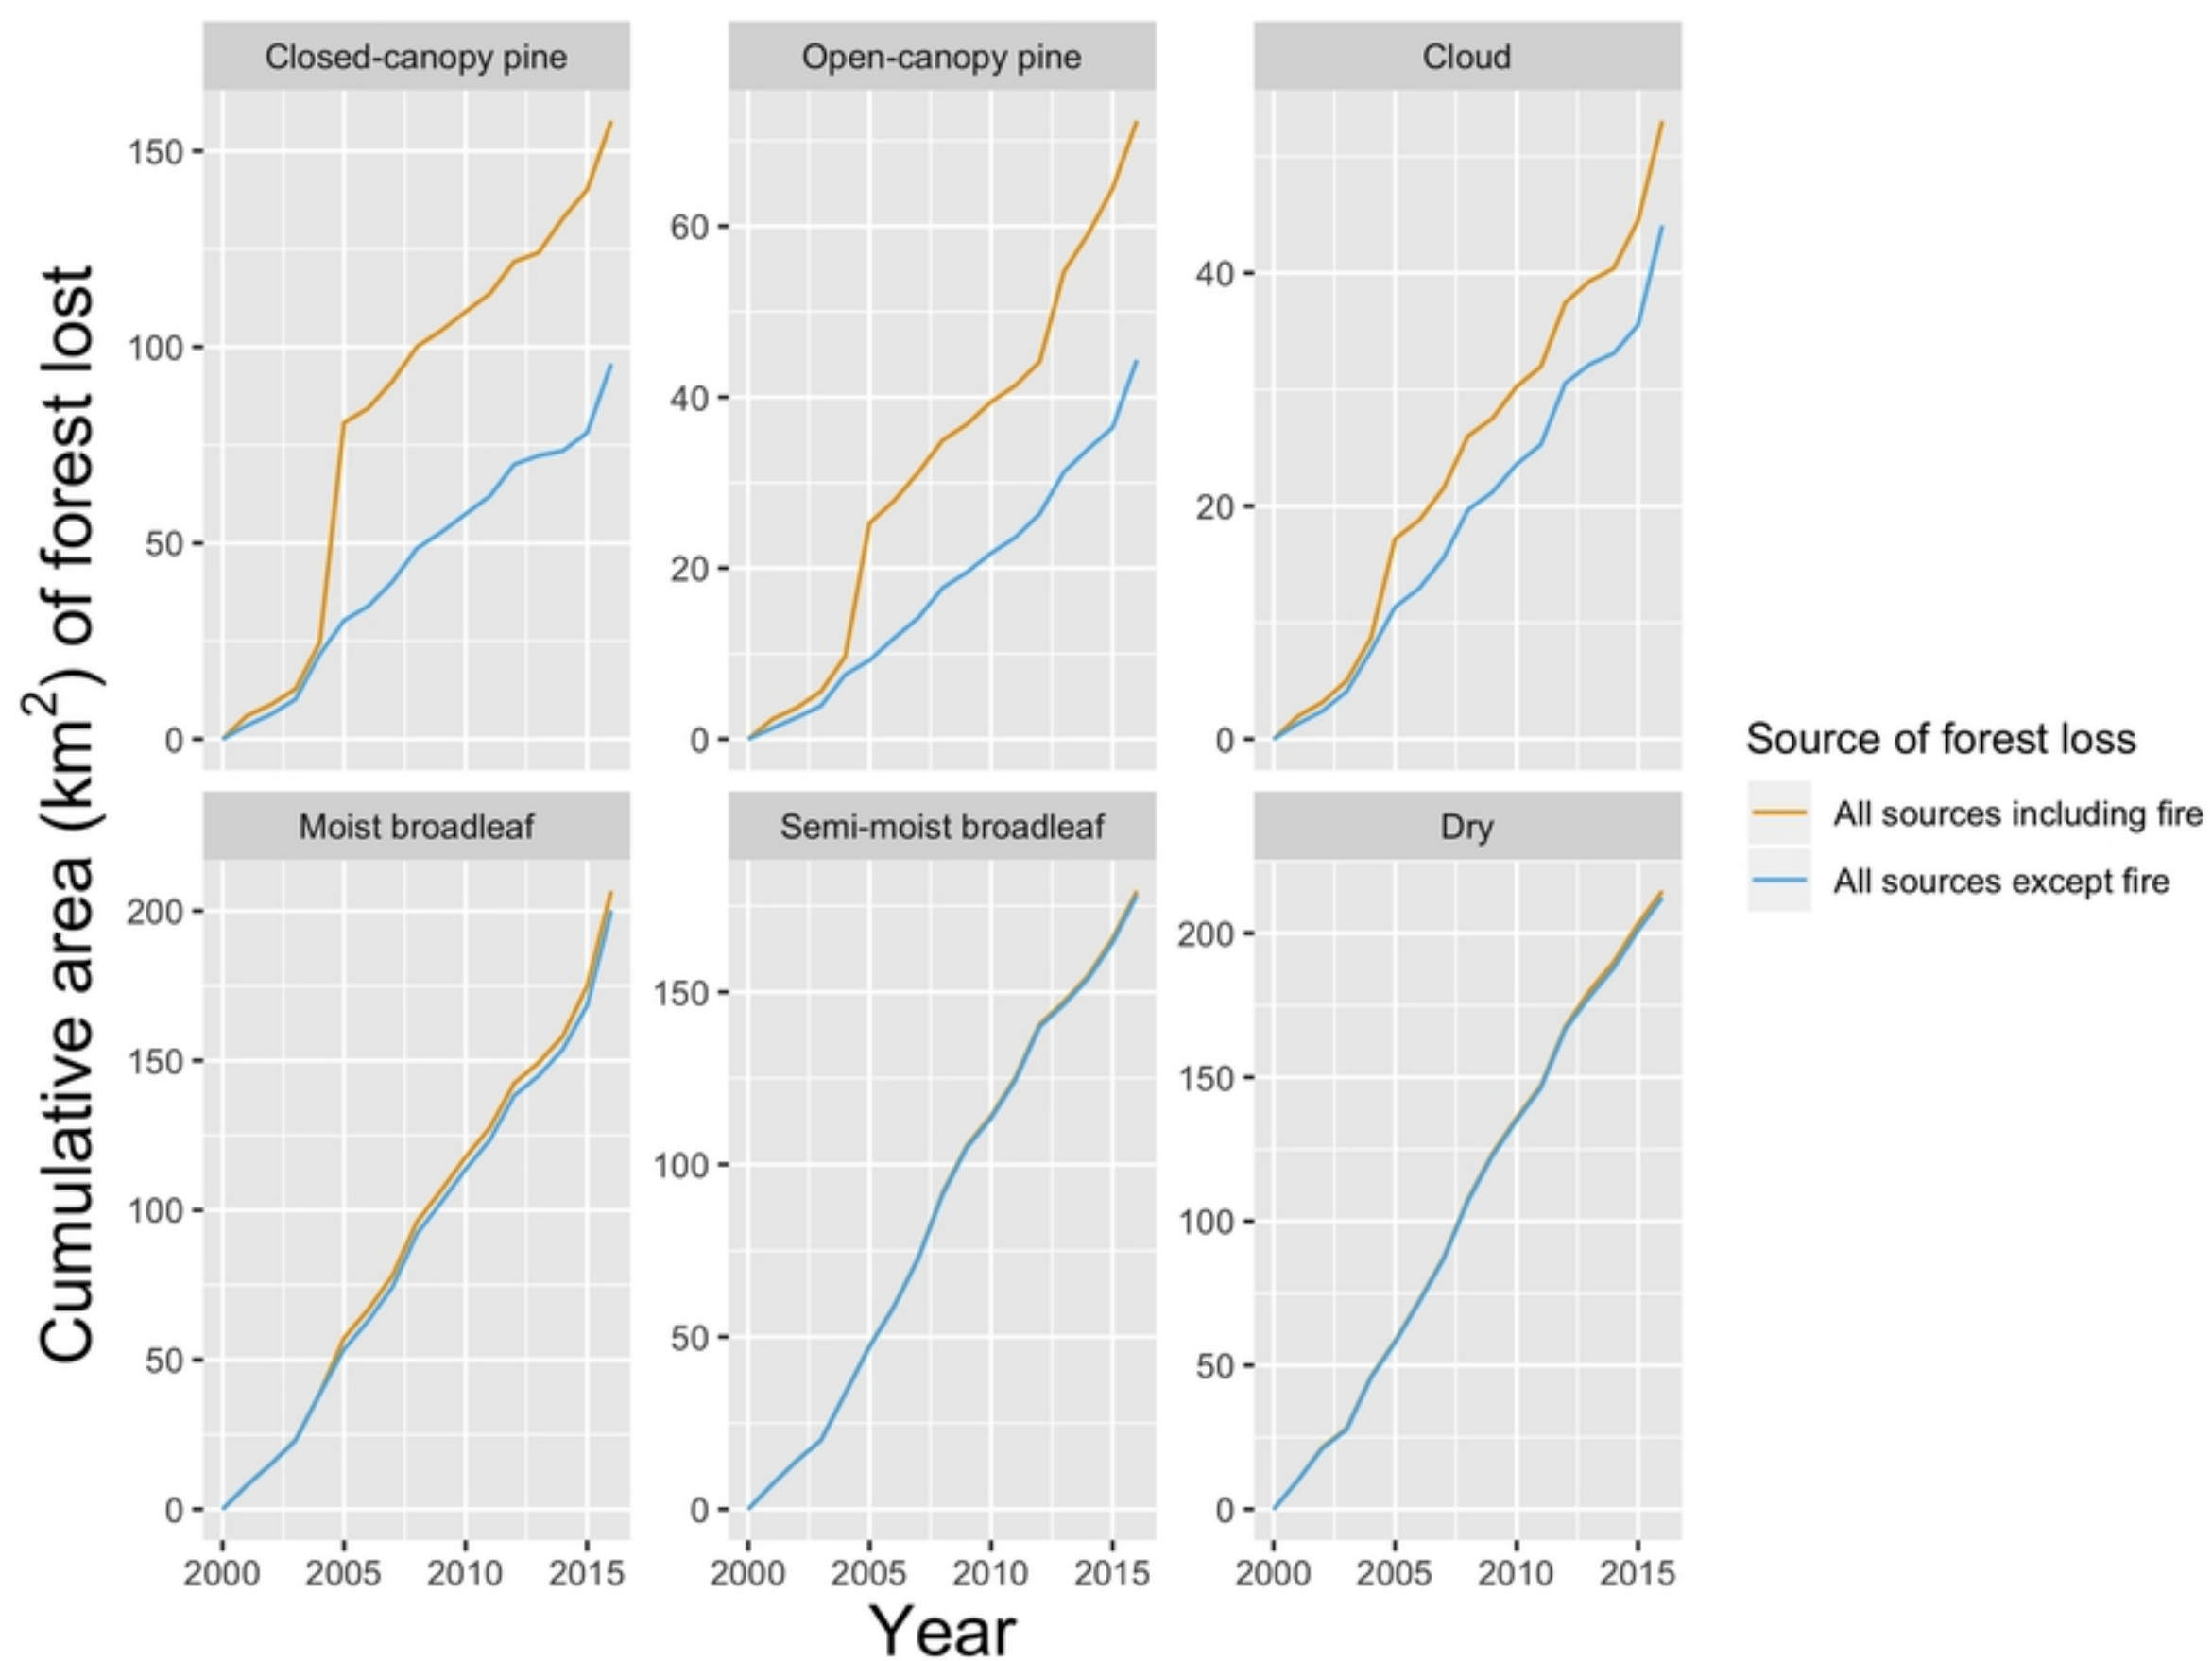

Figure 2



Area (km<sup>2</sup>) of protected closed-canopy pine forest

bioRxiv preprint doi: <https://doi.org/10.1101/558346>; this version posted February 22, 2019. The copyright holder for this preprint (which was not certified by peer review) is the author/funder, who has granted bioRxiv a license to display the preprint in perpetuity. It is made available under aCC-BY 4.0 International license.

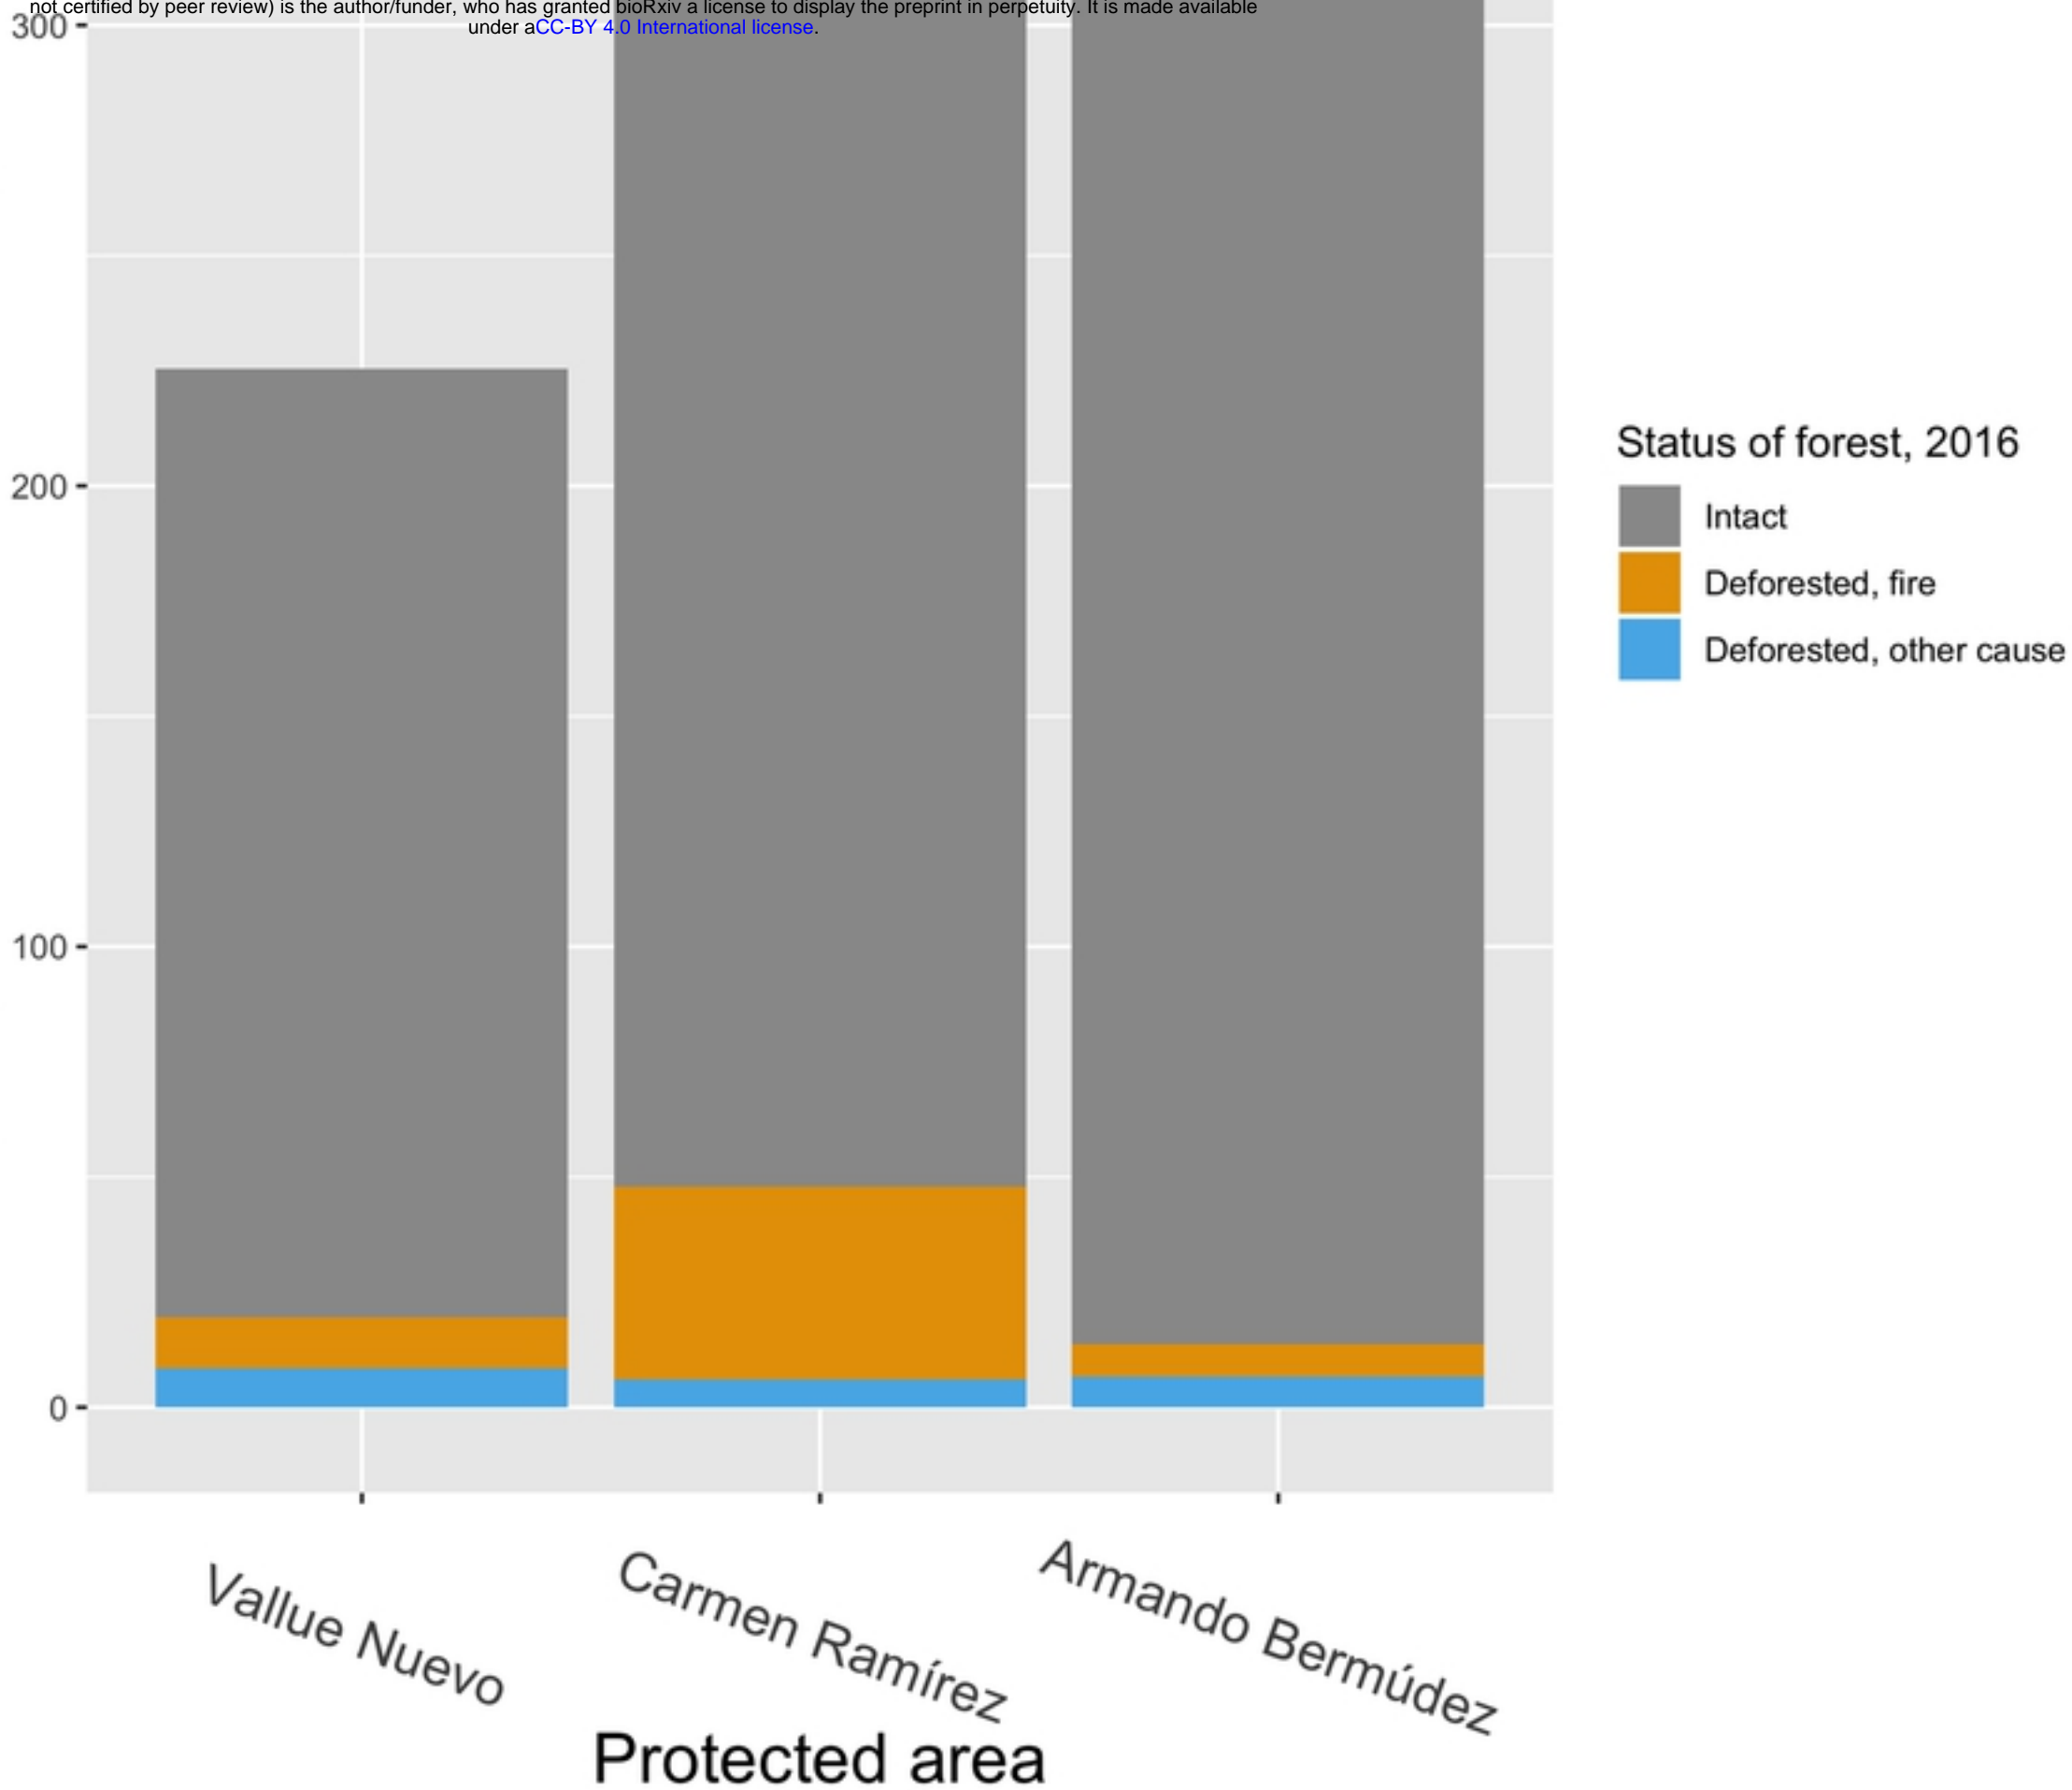

Figure 3



bioRxiv preprint doi: <https://doi.org/10.1101/558346>; this version posted February 22, 2019. The copyright holder for this preprint (which was not certified by peer review) is the author/funder, who has granted bioRxiv a license to display the preprint in perpetuity. It is made available under aCC-BY 4.0 International license.

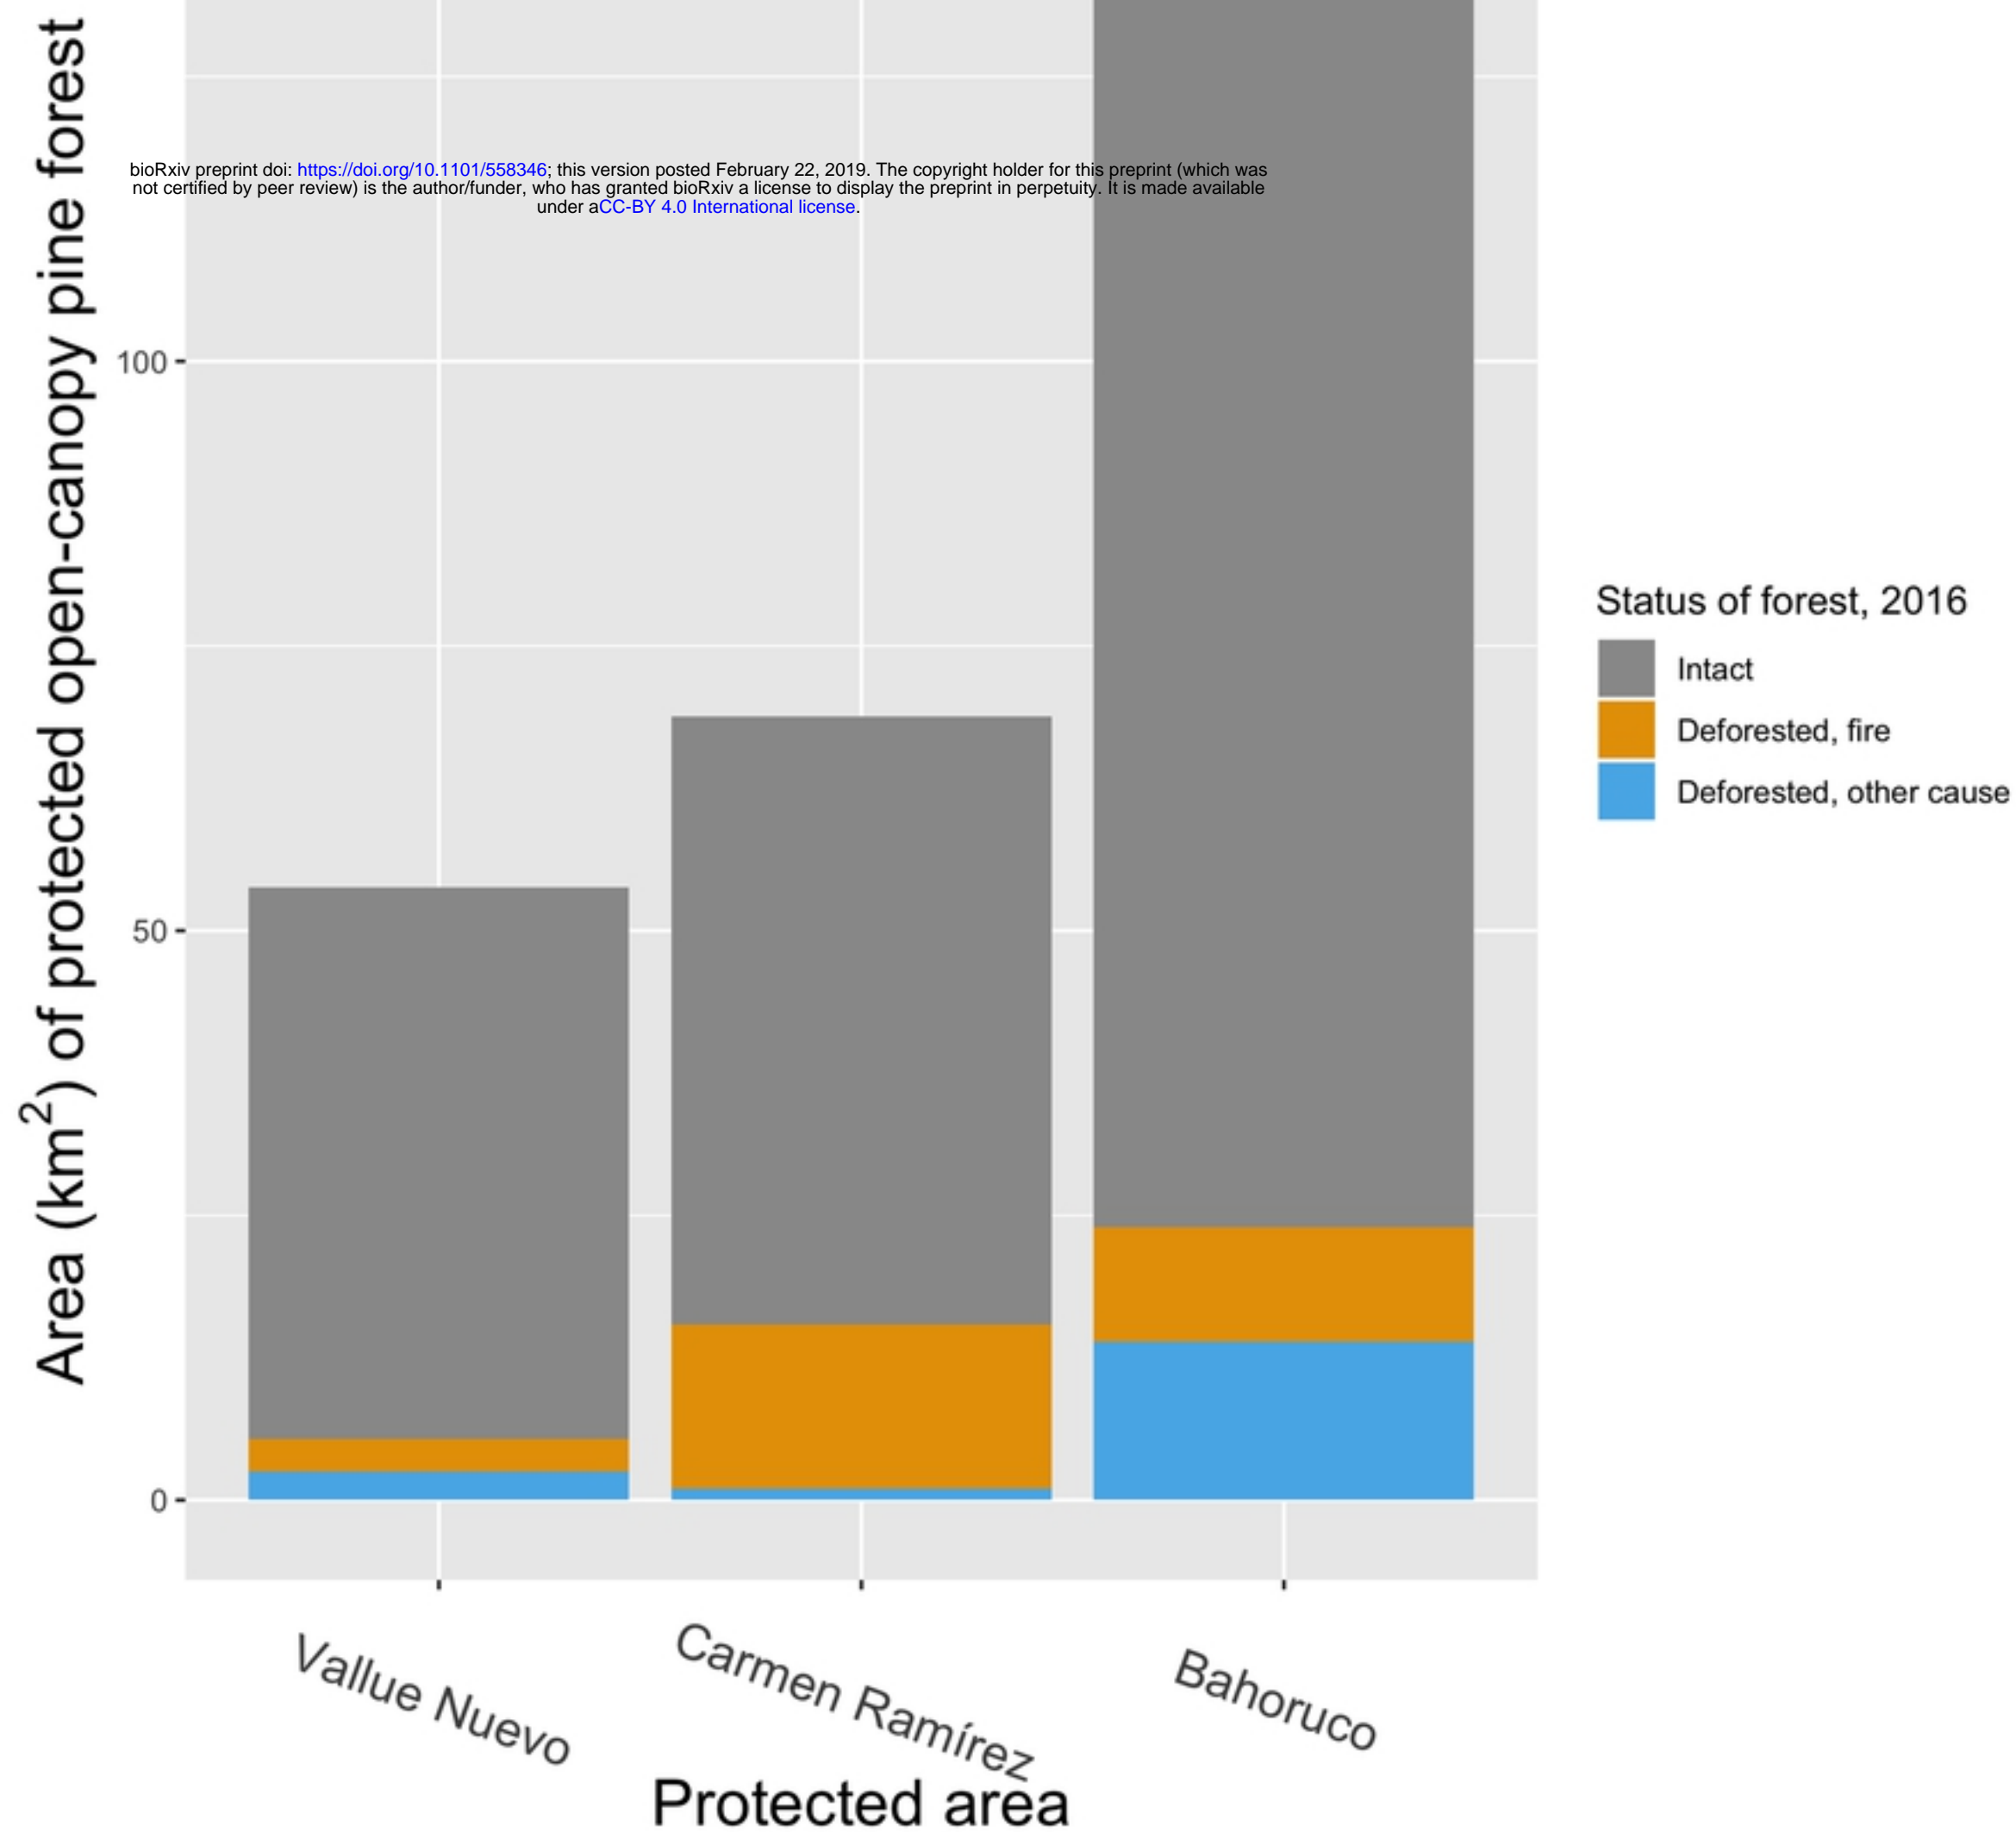

Figure 4

bioRxiv preprint doi: <https://doi.org/10.1101/558346>; this version posted February 22, 2019. The copyright holder for this preprint (which was not certified by peer review) is the author/funder, who has granted bioRxiv a license to display the preprint in perpetuity. It is made available under aCC-BY 4.0 International license.

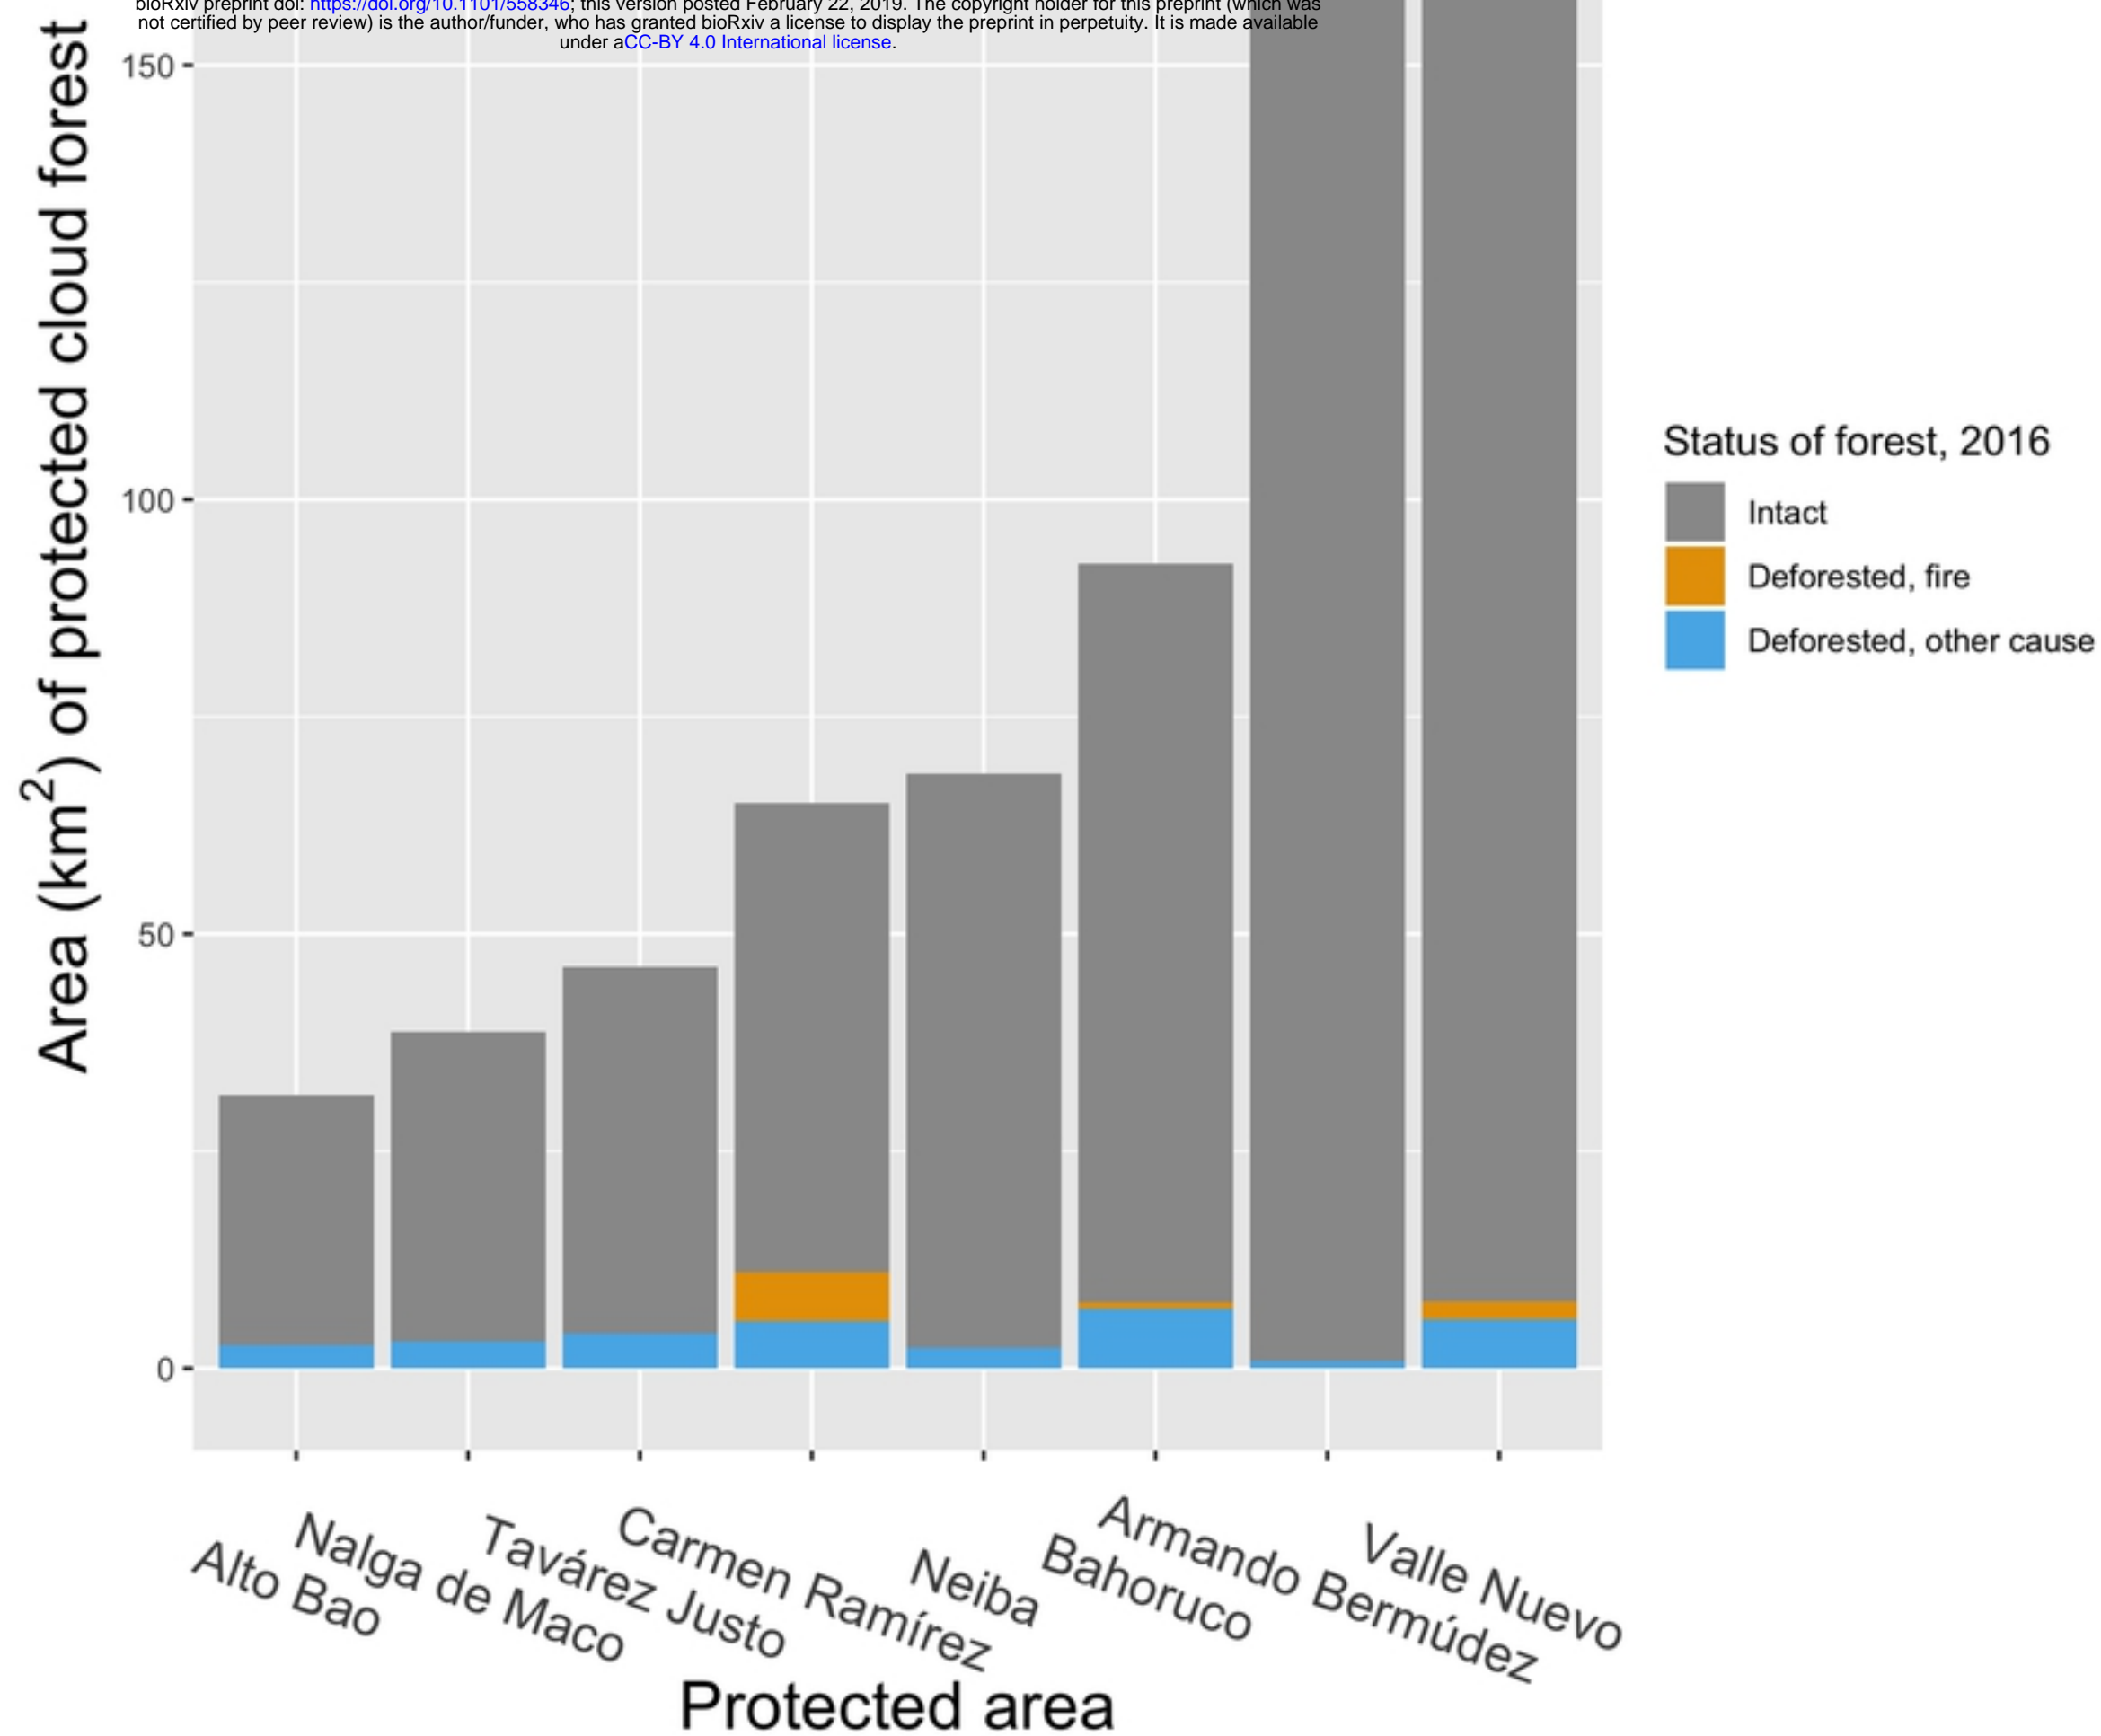

Figure 5

Area (km<sup>2</sup>) of protected moist broadleaf forest

bioRxiv preprint doi: <https://doi.org/10.1101/558346>; this version posted February 22, 2019. The copyright holder for this preprint (which was not certified by peer review) is the author/funder, who has granted bioRxiv a license to display the preprint in perpetuity. It is made available under aCC-BY 4.0 International license.

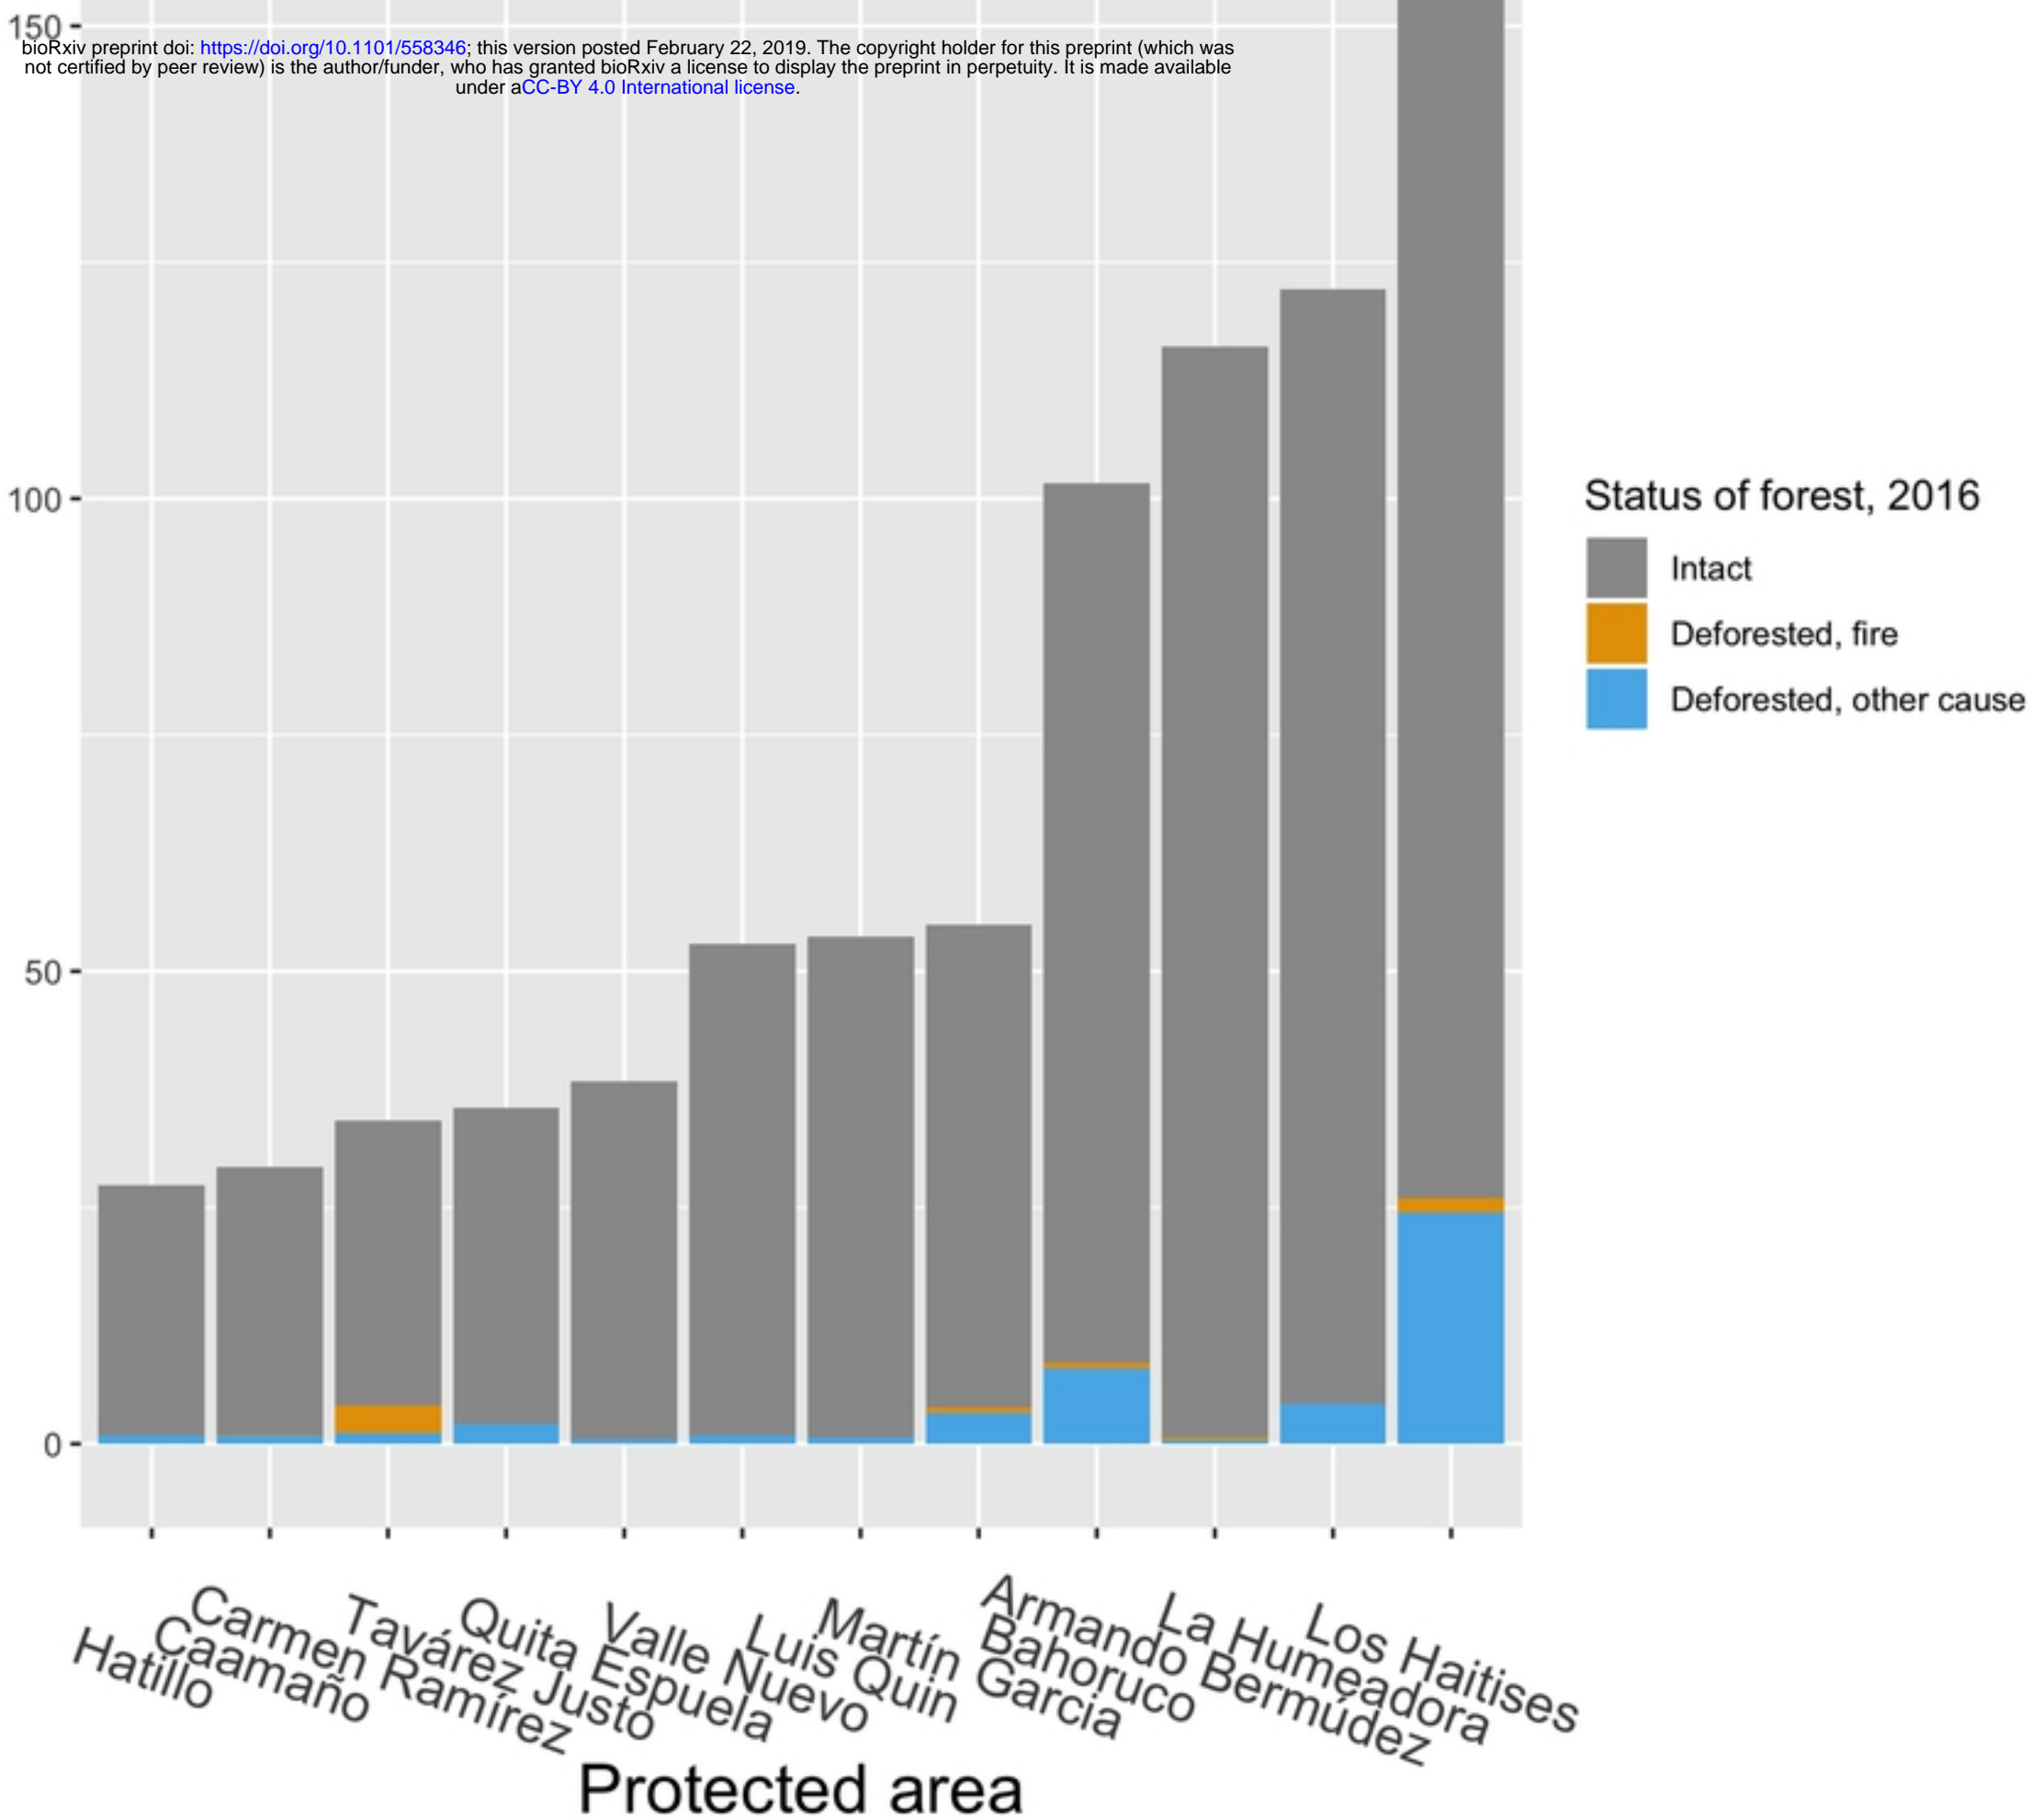

Figure 6

bioRxiv preprint doi: <https://doi.org/10.1101/558346>; this version posted February 22, 2019. The copyright holder for this preprint (which was not certified by peer review) is the author/funder, who has granted bioRxiv a license to display the preprint in perpetuity. It is made available under aCC-BY 4.0 International license.

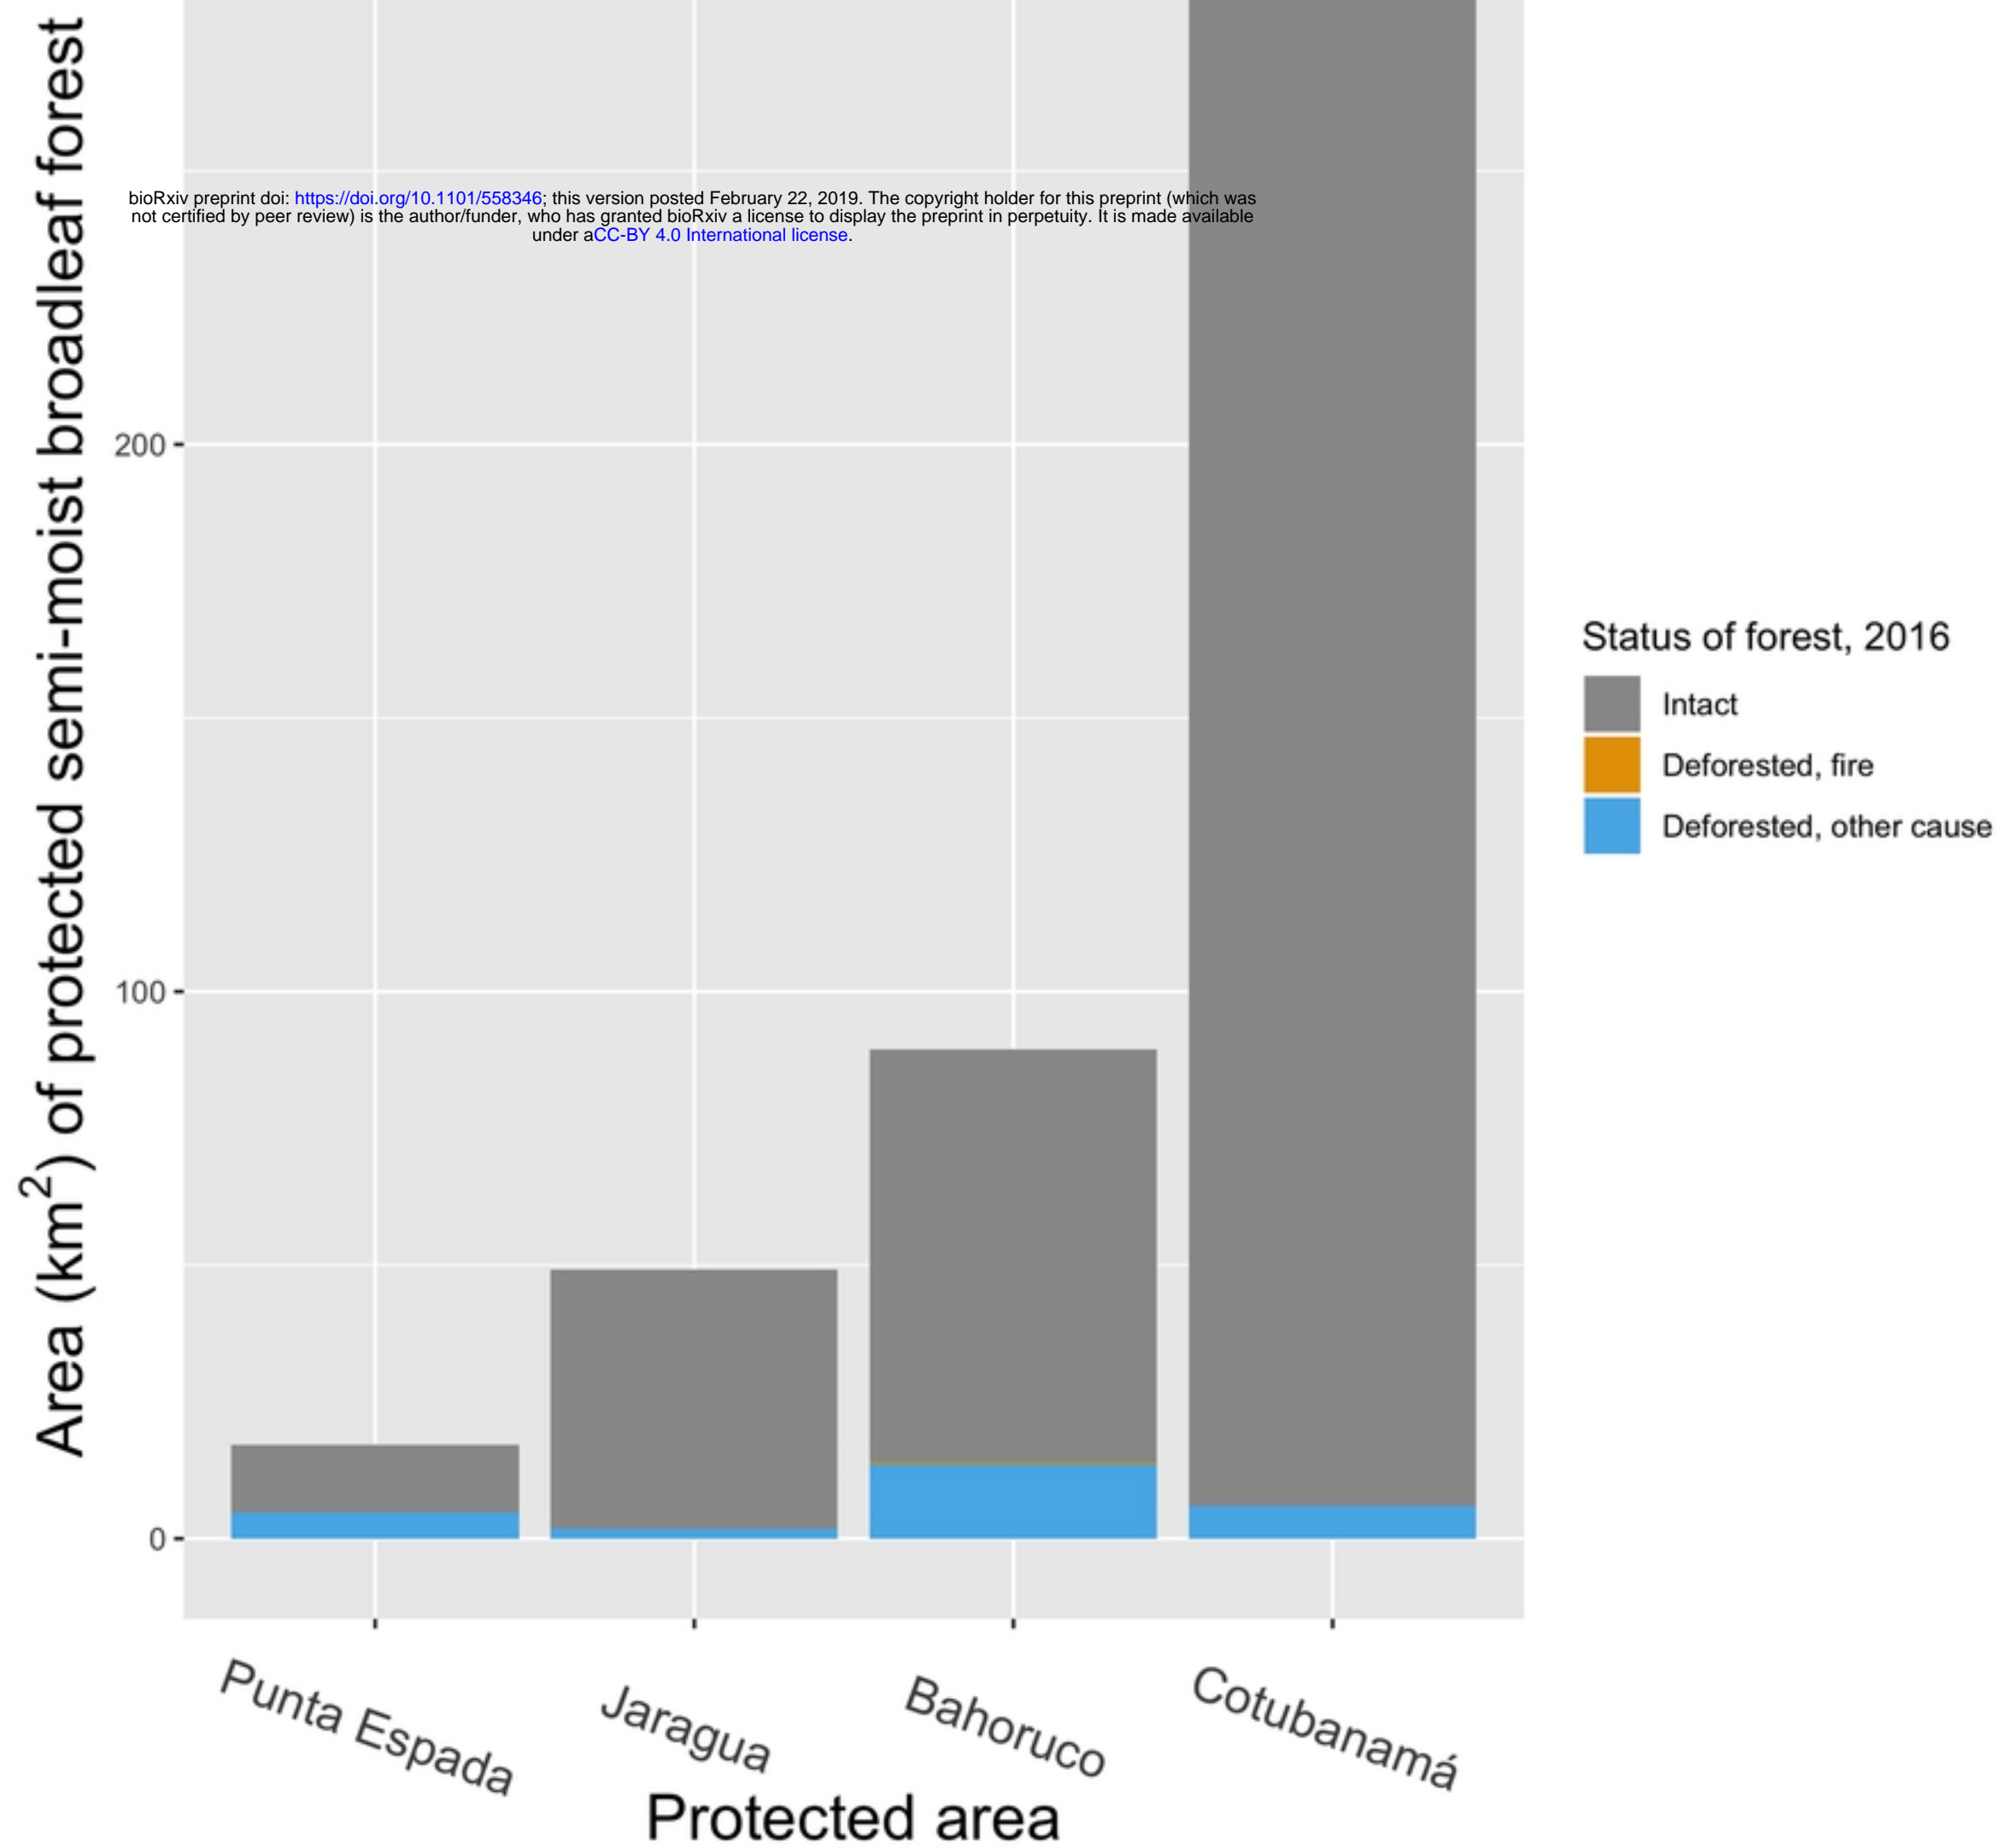

Figure 7

bioRxiv preprint doi: <https://doi.org/10.1101/558346>; this version posted February 22, 2019. The copyright holder for this preprint (which was not certified by peer review) is the author/funder, who has granted bioRxiv a license to display the preprint in perpetuity. It is made available under aCC-BY 4.0 International license.

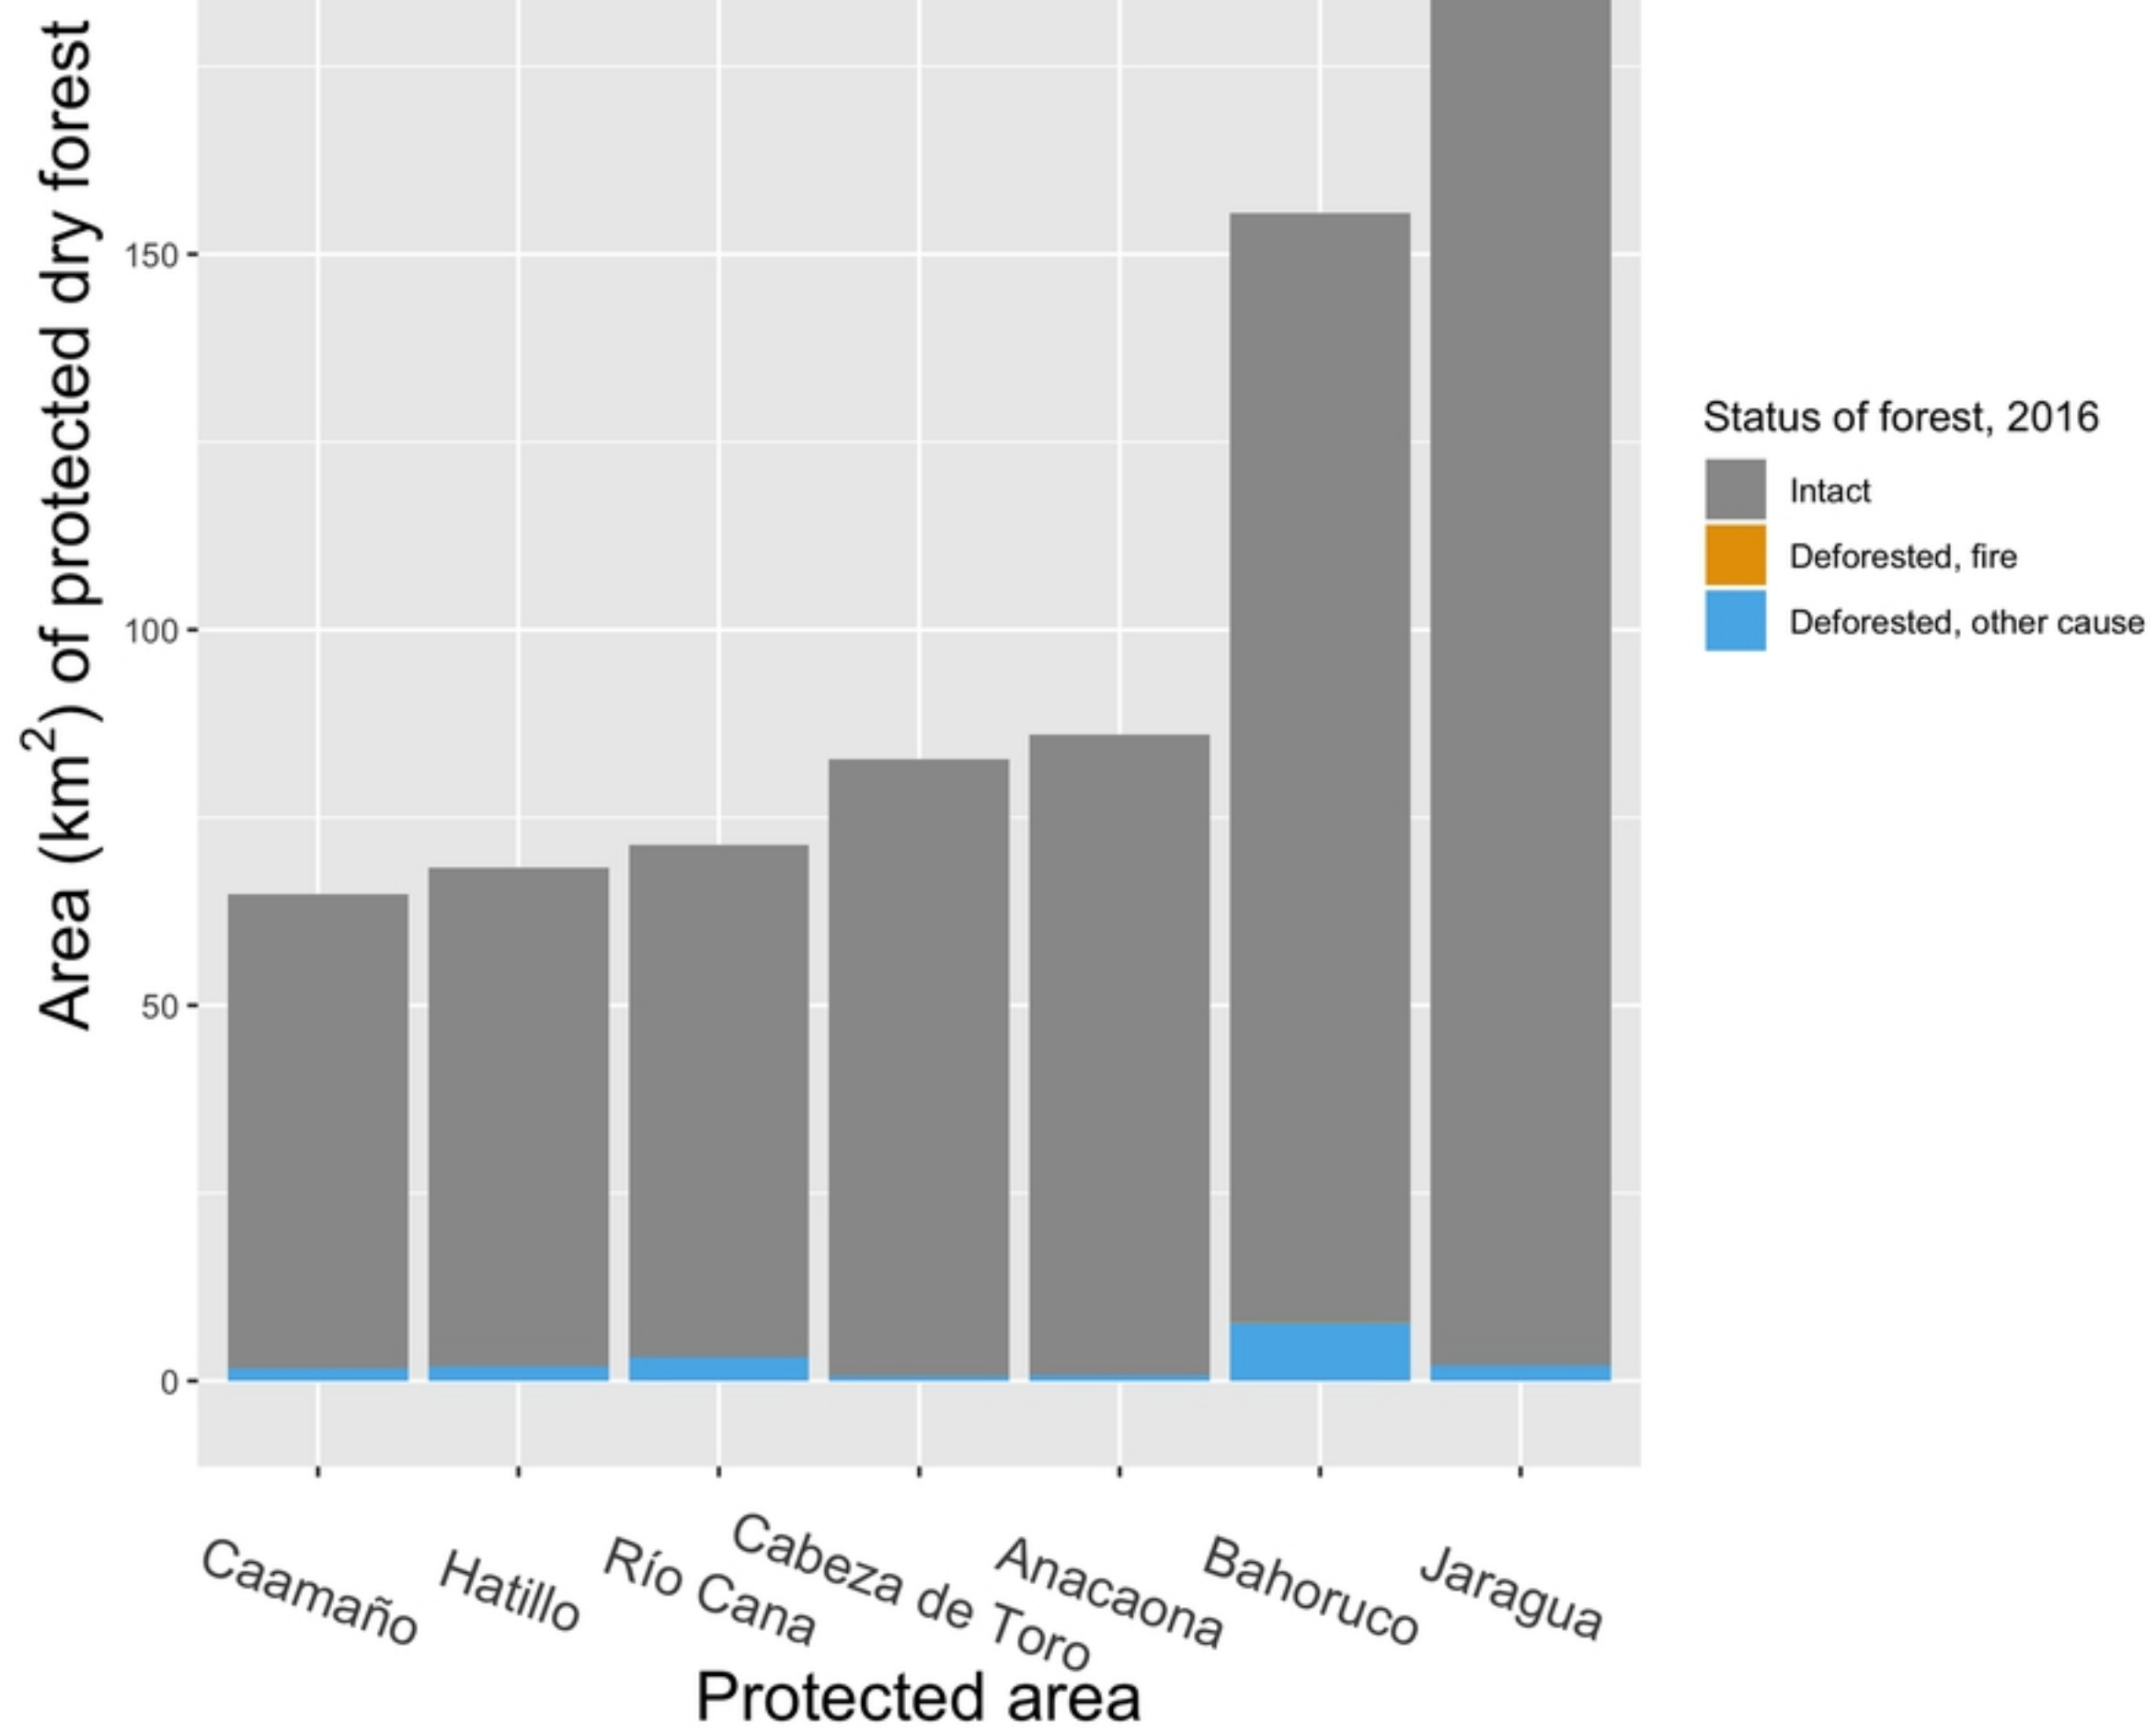

Figure 8
